# Supplementary material for: Integrative Gene Regulatory Network Analysis Reveals Light-Induced Regional Gene Expression Phase Shift Programs in the Mouse Suprachiasmatic Nucleus
Source: PLoS One. 2012 May 25;7(5):e37833. doi: 10.1371/journal.pone.0037833 (PMC3360606; doi:10.1371/journal.pone.0037833)
Supplement: Table S1 — Genes used in Biomark analysis. List of genes used the BioMark. Information include: office gene symbol, gene name, gene_ID, accession numbers, gene functions inferred from literature search, forward/reverse primers for qPCR, UPL used, and relevant literature. (XLS) [file pone.0037833.s006.xls]

## Sheet: Sheet1
NUMBER	SYMBOL	GENE NAME	GENE ID/ENTREZ ID	ACCESSION #	FUNCTION	Forward_Name	Forward Primer	Reverse_Name	Reversve_Primer	UPL Probe #	REFERENCE
1	avp	Arginine vasopressin	11998	NM_009732.1	SCN neuropeptide	avp_NM_009732.1_131F	ctctgacatggagctgagaca	avp_NM_009732.1_239R	gggcaggtagttctcctcct	26
2	grp	Gastrin releasing peptide	225642	NM_175012.2	SCN neuropeptide	grp_NM_175012.2_231F	cacggtcctggctaagatgt	grp_NM_175012.2_274R	ggattcatccgtgctctttt	26
3	vip	Vasoactive internal polypeptide	22353	NM_011702.2	SCN neuropeptide	vip_NM_011702.2_648F	gaggagcagtgagggagattc	vip_NM_011702.2_719R	cgtggttgttttccttcgag	78
4	bhlhe40	basic helix-loop-helix family, member e40 (Dec1/Sharp2)	20893	NM_011498.4	Circadian	bhlhe40_NM_011498.4_1392F	cagcttcatgaacccagaca	bhlhe40_NM_011498.4_1424R	gtgccaaaggagaagggagt	29	Honma S et al 2002, Rossner MJ 2008
6	bmal1 (arntl)	Bmal1	11865	NM_007489.3	Circadian	bmal1_NM_007489.3_2138F	ttctccaggaggcaagaaga	bmal1_NM_007489.3_2174R	gcctgccctggtaatagtcc	109
7	clock	Clock	12753	NM_007715.5	Circadian	clk_NM_007715.5_1677F	ttgatcacagcccaactcc	clk_NM_007715.5_1736R	ggatctttgtcggtgtgga	16
8	cry1	Cryptochrome 1	12952	NM_007771.3	Circadian	cry1_NM_007771.3_705F	ctatatcctcgacccctggtt	cry1_NM_007771.3_740R	caagacactgaagcaaaaatcg	105
9	cry2	Cryptochrome 2	12953	NM_009963.4	Circadian	cry2_NM_009963.4_214F	gctgcgtctacatcctcgac	cry2_NM_009963.4_258R	tccagagattgcagtaggaacc	105
10	csnk1d	Casein kinase 1 delta	104318	NM_139059.2	Circadian	csnk1e_NM_013767.6_1289F	tgagcatgagactccacagag	csnk1e_NM_013767.6_1359R	tcaaatggcacgcttgtct	63
11	csnk1e	Casein kinase 1 epsilon	27373	NM_013767.6	Circadian	csnk1d_NM_139059.2_478F	catcctcagctccacattga	csnk1d_NM_139059.2_540R	acattgtagtccccctcagc	105
12	gsk3b	glycogen synthase kinase 3 beta	56637	NM_019827.6	Circadian	gsk3b_NM_019827.6_1808F	ttctacaggacaagcgatttaaga	gsk3b_NM_019827.6_1834R	cggactatgttacagtggtctagc	50
13	npas2	Npas2	18143	NM_008719.2	Circadian	npas2_NM_008719.2_1355F	ggcacctcaggctacgact	npas2_NM_008719.2_1421R	ctttgccaaactgcatcaga	85
14	nr1d1	Rev-erb-alpha	217166	NM_145434.3	Circadian	nr1d1_NM_145434.3_2119F	aggagctgggcctattcac	nr1d1_NM_145434.3_2212R	cggttcttcagcaccagag	1
15	nr1d2	Rev-erb-beta	353187	NM_011584.4	Circadian	nr1d2_NM_011584.4_1419F	gagggaggatgcatctggt	nr1d2_NM_011584.4_1511R	gcaaattccaccacctcttt	3
16	per1	Period 1	18626	NM_011065.4	Circadian	per1_NM_011065.4_2614F	gcttcgtggacttgacacct	per1_NM_011065.4_2675R	tgctttagatcggcagtggt	71
17	per2	Period 2	18627	NM_011066.3	Circadian	per2_NM_011066.3_1193F	acccacacaccaaactgctt	per2_NM_011066.3_1244R	ggcgtctcgatcagatcct	64
18	per3	Period 3	18628	NM_011067.2	?	per3_NM_011067.2_3271F	cactgcacctctggtgagc	per3_NM_011067.2_3313R	actgctggcactgcttcc	18
19	rora	Ror-alpha	19883	NM_013646.1	Circadian	rora_NM_013646.1_789F	cctactgttccttcaccaacg	rora_NM_013646.1_825R	atgttctgggcaaggtgttc	60
20	rorb	Ror-beta	225998	NM_146095.3	Circadian	rorb_NM_146095.3_1328F	atgatgagaccctggcaaag	rorb_NM_146095.3_1386R	tggatgagactgcttaaatacctg	7
21	arih1	Ariadne ubiquitin-conjugating enzyme, E2-binding protein homolog 1	23806	NM_019927.2	light response gene	arih1_NM_019927.2_449F	gccacttcaattgggataaaga	arih1_NM_019927.2_494R	ggattaattacatgacactcagcaa	80	Araki R et al 2006
22	btg2	B-cell translocation gene 2, anti-proliferative	12227	NM_007570.2	light response gene	btg2_NM_007570.2_213F	gcgagcagagactcaaggtt	brg2_NM_007570.2_243R	ccagtggtgtttgtaatgatcg	1	Porterfield VM et al 2007, Araki R et al 2006
23	ccnl1	Cyclin L1	56706	NM_019937.3	light response gene	ccn1_NM_019937.3_1122F	caactcttggtggattttctcc	ccn1_NM_019937.3_1151R	ggtgatttctcttcagctttcac	9	Araki R et al 2006
24	cebpb	CCAAT enhancer binding protein	12608	NM_009883.3	light response gene	cebpb_NM_009883.3_854F	aagatgcgcaacctggag	cebpb_NM_009883.3_924R	cagggtgctgagctctcg	67	Araki R et al 2006
25	csrnp1	AXIN1 up-regulated 1 (Csrnp1 cysteine-serine-rich nuclear protein 1)	215418	NM_153287.3	light response gene	csrnp1_NM_153287.3_268F	gtggcctccagagtttcact	csrnp1_NM_153287.3_320R	tagacggtgatgccgttaaa	85	Araki R et al 2006
26	dusp1	Dual specificity phosphatase 1	19252	NM_013642.3	light response gene	dusp1_NM_013642.3_515F	ccactcaagtcttctttctccaa	dusp1_NM_013642.3_549R	gactgtttgctgcacagctc	4	Porterfield VM et al 2007, Ueda H et al 2002, Doi M et al 2007
27	dusp4	Dual specificity phosphatase 4	319520	NM_176933.4	light response gene	dusp4_NM_176933.4_885F	ccgtcgaagacaaccaca	dusp4_NM_176933.4_956R	ctggcagtgaaccagcact	17	Araki R et al 2006
28	egr1	Early growth response 1	13653	NM_007913.5	light response gene	egr1_NM_007913.5_579F	cctatgagcacctgaccaca	egr1_NM_007913.5_630R	tcgtttggctgggataactc	22	Porterfield VM et al 2007
29	egr2	Early growth response 2	13654	NM_010118.3	light response gene	egr2_NM_010118.3_1466F	cccttccagtgtcggatct	egr2_NM_010118.3_1501R	tgtgggttcggatgtgagta	41	Porterfield VM et al 2007
30	fos	FBJ osteosarcoma oncogene	14281	NM_010234.2	light response gene	fos_NM_010234.2_230F	gggacagcctttcctactacc	fos_NM_010234.2_277R	gatctgcgcaaaagtcctgt	67	Porterfield VM et al 2007, Araki R et al 2006
31	gadd45b	Growth arrest and DNA-damage-inducible 45 beta	17873	NM_008655.1	light response gene	gadd45b_NM_008655.1_596F	ctgcctcctggtcacgaa	gadd45b_NM_008655.1_649R	ttgcctctgctctcttcaca	10	Porterfield VM et al 2007
32	jun	Jun oncogene	16476	NM_010591.2	light response gene	jun_NM_010591.2_2135F	tggagtgggaaggacgtg	jun_NM_010591.2_2174R	aaagtctgccggccaatag	106	Porterfield VM et al 2007, Araki R et al 2006
33	junb	Jun-B oncogene	16477	NM_008416.2	light response gene	junb_NM_008416.2_839F	cgtctacaccaacctcagca	junb_NM_008416.2_889R	cgggtatgagctcccagtc	110
34	kdm6b	Jumonji domain containing 3 (KDM1 lysine (K)-specific demethylase 6B)	216850	NM_001017426.1	light response gene	kdm6b_NM_001017426.1_917F	tcagcacagagccaaggtc	kdm6b_NM_001017426.1_962R	tagccccatagttccgtttg	1	Araki R et al 2006
35	klf4	Kruppel-like factor 4 (gut)	16600	NM_010637.3	light response gene	klf4_NM_010637.3_673F	ccgtccttctccacgttc	klf4_NM_010637.3_731R	gagttcctcacgccaacg	7	Porterfield VM et al 2007, Araki R et al 2006
36	nnat	Neuronatin	18111	NM_010923.2	light response gene	nnat_NM_010923.2_81F	cacccactttcggaaccat	nnat_NM_010923.2_153R	tgcagcattccaggaaca	66	Araki R et al 2006
37	nr4a1	Nuclear receptor subfamily 4, group A, member 1	15370	NM_010444.2	light response gene	nr4a1_NM_010444.2_1011F	gctgcaagggcttcttca	nr4a1_NM_010444.2_1096R	tctggaagcggcagaact	70	Porterfield VM et al 2007, Araki R et al 2006
38	nr4a2	Nuclear receptor subfamily 4, group A, member 2	18227	NM_013613.2	light response gene	nr4a2_NM_013613.2_1568F	tcagagcccacgtcgatt	nr4a2_NM_013613.2_1604R	tagtcagggtttgcctggaa	64	Araki R et al 2006
39	pim3	Proviral integration site 3	223775	NM_145478.2	light response gene	pim3_NM_145478.2_1204F	atggtgtgtggggacattc	pim3_NM_145478.2_1264R	aagctgctggcactctgg	15	Porterfield VM et al 2007
40	plk2	Serum-inducible kinase (Plk2 polo-like kinase 2)	20620	NM_152804.2	light response gene	plk2_NM_152804.2_798F	ctgaaggtgggagactttgg	plk2_NM_152804.2_835R	tggggttccacatattgttctc	71	Araki R et al 2006, Ueda H et al 2002
41	rrad	Ras-related assocated with diabetes	56437	NM_019662.2	light response gene	rrad_NM_019662.2_1017F	gggttgtgcgccagatac	rrad_NM_019662.2_1076R	ttcttgccaaggctctcc	56	Porterfield VM et al 2007, Araki R et al 2006
42	slc39a6	Solute carrier family 29	106957	NM_139143.3	light response gene	slc39a6_NM_139143.3_479F	ccagtcccttcggacctc	slc39a6_NM_139143.3_533R	ctgtggccattgcacctt	70	Araki R et al 2006
43	ssfa2	Sperm-specific antigen 2	70599	NM_080558.4	light response gene	ssfa2_NM_080558.4_415F	agcagtggtacgccgaag	ssfa2_NM_080558.4_453R	tcagctcccagtgacaggt	69	Araki R et al 2006
44	stk40	serine/threonine kinase 40	74178	NM_028800.3	light response gene	stk40_NM_028800.3_1275F	gaccaaatgagcagctctgac	stk40_NM_028800.3_1330R	agcagttgctgtcgcatgta	82	Araki R et al 2006
45	tiparp	TCDD-inducible poly(ADP-ribose) polymerase	99929	NM_178892.5	light response gene	tiparp_NM_178892.5_1058F	agatcaaaaggacaaccactcag	tiparp_NM_178892.5_1145R	cccaaaagtcttgtcctcca	53	Porterfield VM et al 2007
46	utrn	Utropin	22288	NM_011682.4	light response gene	utrn_NM_011682.4_6296F	gcgctggagcactcttgta	utrn_NM_011682.4_6337R	ataccccaacacctgctgac	26	Araki R et al 2006
47	avpr1a	arginine vasopressin receptor 1A	54140	NM_016847.2	AVP receptor	avpr1a_NM_016847.2_582F	tgcatctcttcatccgacac	avpr1a_NM_016847.2_613R	acagctgtggtaacacttggaa	64	SCN?
49	avpr2	arginine vasopressin receptor 2	12000	NM_019404.1	AVP receptor	avpr2_NM_019404.1_713F	aaatggcagtggggtatttg	avpr2_NM_019404.1_745R	aggtgacataggcacgaagg	107	SCN?
50	brs3	Brs3 bombesin-like receptor 3	12209	NM_009766.3	Neuropeptide Receptor	brs3_NM_009766.3_2194F	gtgagcagtgccctctttct	brs3_NM_009766.3_2228R	atgacacgtgaacagccaga	6
51	cul5	cullin 5 (VACM-1)	75717	NM_027807.3	Calcium receptor (AVP activated)	cul5_NM_027807.3_1415F	gcatattataagtgcgggccta	cul5_NM_027807.3_1450R	gctccacatacttctcagagtcag	49	SCN?
52	gabbr2	gamma-aminobutyric acid (GABA) B receptor, 2	242425	NM_001081141.1	GABA receptor	gabbr2_NM_001081141.1_2164F	ctgcggaggacagtggag	gabbr2_NM_001081141.1_2219	gtgttttcgcagtgttccag	3
53	gabra1	gamma-aminobutyric acid (GABA) A receptor, subunit alpha 1	14394	NM_010250.4	GABA receptor	gabra1_NM_010250.4_720F	cgatcctctctcccacactt	gabra1_NM_010250.4_771R	tttcttcatcacgggcttg	50
54	gria1	glutamate receptor, ionotropic AMPA1 (alpha 1)	14799	NM_008165.3	light response gene/glutamate receptor	gria1_NM_008165.3_493F	tttgctttgtcacaactcacg	gria1_NM_008165.3_563R	tttggagaactgggaacagaa	38	Araki R et al 2006
55	gria2	glutamate receptor, ionotropic, AMPA2 (alpha 2)	14800	NM_013540.2	Glutamate receptor	gria2_NM_013540.2_1255F	gatggtcaacactcgaagagaa	gria2_NM_013540.2_1293R	tcataagtcagggccgaagt	1
56	gria4	glutamate receptor, ionotropic, AMPA4 (alpha 4)	14802	NM_019691.4	Glutamate receptor	gria4_NM_019691.4_896F	cttcagctaagaccttcattgaga	gria4_NM_019691.4_981R	cctgctttttccattatagcttg	79
57	grin1	glutamate receptor, ionotropic, NMDA1 (zeta 1) NMDAR-1	14810	NM_008169.1	Glutamate receptor	grin1_NM_008169.1_2621F	tacaagcgacacaaggatgc	grin1_NM_008169.1_2687R	ggctctgctctaccactctttc	38
58	grin2c	glutamate receptor, ionotropic, NMDA2C (epsilon 3) NMDAR-2C	14813	NM_010350.2	Glutamate receptor	grin2c_NM_010350.2_3097F	gaagcgggccatagacct	grin2c_NM_010350.2_3152R	tggcagatccctgagagc	94
59	grm1	glutamate receptor, metabotropic 1 (mGluR1)	14816	NM_016976.2	Glutamate receptor	grm1_NM_016976.2_1827F	gatgagaagggggatgcac	grm1_NM_016976.2_1881R	caggttcccacatggacata	110
60	grm5	glutamate receptor, metabotropic 5 (mGluR5)	108071	NM_001081414.2	Glutamate receptor	grm5_NM_001081414.2_2266F	gcagtgaaccgtgtgagaaa	grm5_NM_001081414.2_2302R	gtgtgcaggtccaacaacag	7
61	grpr	gastrin releasing peptide receptor	14829	NM_008177.2	Neuropeptide Receptor	grpr_NM_008177.2_1260F	ctccatgctccactttgtca	grpr_NM_008177.2_1292R	aggggttcacacaggagttg	79
62	nmbr	neuromedin B receptor	18101	NM_008703.2	Neuropeptide Receptor	nmbr_NM_008703.2_356F	gctgggctgcaaactcat	nmbr_NM_008703.2_428R	catggggttcacgatagctc	42
63	slc12a4	solute carrier family 12, member 4 (KCC1)	20498	NM_009195.2	K/Cl transporter	slc12a4_NM_009195.2_1081F	cccctacttcctgctcaaca	slc12a4_NM_009195.2_1139R	ccaggtaagcgctccaga	1	Belenky MA et al 2009
64	slc12a5	solute carrier family 12, member 5 (KCC2)	57138	NM_020333.2	K/Cl transporter	slc12a5_NM_020333.2_2577F	tttctggacaaccatccaca	slc12a5_NM_020333.2_2612R	ttcaccttctcagcctccat	82	Belenky MA et al 2009
65	slc12a6	solute carrier family 12, member 6 (KCC3)	72425	NM_133648.2	K/Cl transporter	slc12a6_NM_133648.2_947F	ggtgccatcaagtcttcctt	slc12a6_NM_133648.2_981R	ttgatgacagggtacggttg	22	Belenky MA et al 2009
66	slc12a7	solute carrier family 12, member 7 (KCC4)	20499	NM_011390.2	K/Cl transporter	slc12a7_NM_011390.2_2787F	gtaccacctcaggatcagtgc	slc12a7_NM_011390.2_2822R	ctcataggtgaatgcggaaat	10	Belenky MA et al 2009
67	vipr2	vasoactive intestinal peptide receptor 2 (VPAC2)	22355	NM_009511.2	Neuropeptide Receptor	vipr2_NM_009511.2_856F	cttcctggcctaccttctga	vipr2_NM_009511.2_917R	gtcccagcaacctgtgtctt	56
68	calb1	calbindin 1	12307	NM_009788.4	Calcium regulation	calb1_NM_009788.4_808F	tctgtgtgagaagaacaaacagg	calb1_NM_009788.4_877R	taagagcaaggtctgttcggta	58
69	camk2a	calcium/calmodulin-dependent protein kinase II alpha	12322	NM_009792.3	Calcium regulation	camk2a_NM_009792.3_865F	cagatcgtccacttccacag	camk2a_NM_009792.3_971R	tccagcaaaatccaaaggag	5
70	camk2b	calcium/calmodulin-dependent protein kinase II, beta	12323	NM_007595.4	Calcium regulation	camk2b_NM_007595.4_1236F	cagccccaaaggatctctc	camk2b_NM_007595.4_1280R	ttccttaatcccgtccactg	1
71	creb1	cAMP responsive element binding protein 1	12912	NM_009952.2	CREB pathway	creb1_NM_009952.2_925F	ccactgatggacagcagattc	creb_NM_009952.2_961R	ggtatgtttgtacatcgcctga	107
72	crebbp	CREB binding protein (CBP/P300)	12914	NM_001025432.1	CREB pathway	crebbp_NM_001025432.1_1750F	gatgaggactctcaatgcccta	crebbp_NM_001025432.1_1781R	ggctgttgatctgttgttattcc	3
73	creb	cAMP responsive element modulator	12916	NM_013498.2	CREB pathway	crem_NM_013498.2_517F	attctttcacgaagaccctcat	crem_NM_013498.2_554R	ttcttcaatcttgggaataccag	6
74	map2k1	mitogen-activated protein kinase kinase 1 (MEK1)	26395	NM_008927.3	MAPK pathway	map2k1_NM_008927.3_1002F	gtgggcacgagatcctacat	map2k1_NM_008927.3_1063R	ccatctccaccagagagagc	50
75	map3k1	mitogen-activated protein kinase kinase kinase 1	26401	NM_011945.2	MAPK pathway	map3k1_NM_011945.2_4072F	tcattcacagagacgtcaaagg	map3k1_NM_011945.2_4111R	cagctccaaagtctgcaattc	110
76	mapk1	mitogen-activated protein kinase 1 (ERK2)	26413	NM_011949.3	MAPK pathway	mapk1_NM_011949.3_697F	accgtgacctcaagccttc	mapk1_NM_011949.3_753R	tgatctggatctgcaacacg	18
77	mapk3	mitogen-activated protein kinase 3 (ERK1)	26417	NM_011952.2	MAPK pathway	mapk3_NM_011952.2_1192F	acacccctgtccttttggat	mapk3_NM_011952.2_1238R	tctgggttgagcaaagttca	15
78	nras	neuroblastoma ras oncogene	18176	NM_010937.2	MAPK pathway	nras_NM_010937.2_402F	agtacatgaggacaggcgaag	nras_NM_010937.2_465R	ctttcacacgcttaatttgctc	6
79	ppp1ca	protein phosphatase 1, catalytic subunit, alpha isoform	19045	NM_031868.2	Protein phospatase	ppp1ca_NM_031868.2_547F	cagccattgtggatgagaag	ppp1ca_NM_031868.2_583R	ctaatctgctccatggattgc	94
80	ppp2ca	protein phosphatase 2 (formerly 2A), catalytic subunit, alpha isoform	19052	NM_019411.4	Protein phospatase	ppp2ca_NM_019411.4_291F	gctgaacgagtgcaagcag	ppp2ca_NM_019411.4_338R	cgttggattcttttgtcagga	95
81	prkaca	protein kinase, cAMP dependent, catalytic, alpha (PKA)	18747	NM_008854.4	PKA pathway	prkaca_NM_008854.4_315F	aaaaatgggagaccccttctc	prkaca_NM_008854.4_344R	gtgccaagggtcttgattcta	26
82	prkacb	protein kinase, cAMP dependent, catalytic, beta	18749	NM_011100.4	PKA pathway	prkacb_NM_011100.4_863F	gcaggacatggacattgtgt	prkacb_NM_011100.4_906R	tccaccgccttattgtaacc	73
83	prkca	protein kinase C, alpha	18750	NM_011101.3	PKC pathway	prkca_NM_011101.3_909F	ggaatgagtccttcacgttca	prkca_NM_011101.3_972R	cccatgaagtcattccgagt	95
84	prkcb	protein kinase C, beta	18751	NM_008855.2	PKC pathway	prkcb_NM_008855.2_1732F	accaagacattctgtggcact	prkcb_NM_008855.2_1764R	agacttcccgtagggctgat	50
85	prkcc	protein kinase C, gamma	18752	NM_011102.3	PKC pathway	prkcc_NM_011102.3_1695F	accagggcatcatctacagg	prkcc_NM_011102.3_1739R	tgccaaagtctgtgatcttga	89
86	prkg1	protein kinase, cGMP-dependent, type I	19091	NM_011160.2	PKG pathway	prkg1_NM_011160.2_2052F	cacctcccataattccaagtg	prkg1_NM_011160.2_2121F	atgtcccagcctgagttgtc	77
87	prkg2	protein kinase, cGMP-dependent, type II	19092	NM_008926.4	PKG pathway	prkg2_NM_008926.4_1949F	cgatggctaccttaagttggtt	prkg2_NM_008926.4_1985R	ccacagaatgtccacgttttc	21
88	rasa1	RAS p21 protein activator 1	218397	NM_145452.3	MAPK pathway	rasa1_NM_145452.3_1236F	tccttagtcagacaaatgttgtcaat	rasa1_NM_145452.3_1312R	aaacaagaaacgtgactgtaataacc	97
89	rasa2	RAS p21 protein activator 2	114713	NM_053268.2	MAPK pathway	rasa2_NM_053268.2_1028F	gctaaagtcaccagatgttcagc	rasa2_NM_053268.2_1096R	gcagcaacagtcgtacaagg	89
90	rasa3	RAS p21 protein activator 3	19414	NM_009025.2	MAPK pathway	rasa3_NM_009025.2_308F	gaccaaaattgtcgagaagtca	rada3_NM_009025.2_338R	aactccgagggatttcacag	55
91	rasd1	RAS, dexamethasone-induced 1 (Dexras)	19416	NM_009026.4	MAPK pathway	rasd1_NM_009026.4_916F	tgcacagcgacctcatgta	rasd1_NM_009026.4_953R	acacagcgctccttgtcc	71	Cheng HY et al, 2004
92	actb	actin, beta	11461	NM_007393.3	Control	actb_NM_007393.3_435F	aaggccaaccgtgaaaagat	actb_NM_007393.3_505R	gtggtacgaccagaggcatac	56
94	gapdh	glyceraldehyde-3-phosphate dehydrogenase	14433	NM_008084.2	Control	gapdh_NM_008084.2_781F	tgtccgtcgtggatctgac	gapdh_NM_008084.2_818R	cctgcttcaccaccttcttg	80
96	tbp	TATA box binding protein	21374	NM_013684.3	Control	tbp_NM_013684.3_258F	gggagaatcatggaccagaa	tbp_NM_013684.3_309R	gatgggaattccaggagtca	97
