# Supplementary material for: Integrative Gene Regulatory Network Analysis Reveals Light-Induced Regional Gene Expression Phase Shift Programs in the Mouse Suprachiasmatic Nucleus
Source: PLoS One. 2012 May 25;7(5):e37833. doi: 10.1371/journal.pone.0037833 (PMC3360606; doi:10.1371/journal.pone.0037833)
Supplement: Table S3 — DAVID annotation of the 89 genes analyzed. Gene functions based on terms retrieved through DAVID. (XLS) [file pone.0037833.s008.xls]

## Sheet: david_result
Gene List	Circadian rhythm	serine/threonine kinase	MAPK signaling pathway	glutamate receptor	transcription	Neuroactive ligand-receptor	membrane	nucleus	Calcium signaling pathway	ion transport	neuron differentiation	biosynthesis	stimulus response
Avp
Grp
Vip
Bhlhe40	bhlhe40				bhlhe40			bhlhe40
Bmal1 (arntl)	bmal1				bmal1			bmal1
Clock	clock				clock			clock
Cry1	cry1				cry1			cry1
Cry2	cry2				cry2			cry2
Csnk1d	csnk1d	csnk1d
Csnk1e	csnk1e	csnk1e
Gsk3b		gsk3b
Npas2	npas2				npas2			npas2
Nr1d1	nr1d1				nr1d1			nr1d1
Nr1d2					nr1d2			nr1d2
Per1	per1				per1			per1
Per2	per2				per2			per2
Per3	per3				per3			per3
Rora					rora			rora			rora	rora
Rorb					rorb			rorb			rorb	rorb
Arih1
Btg2					btg2						btg2
Ccnl1					ccnl1			ccnl1
Cebpb					cebpb			cebpb			cebpb	cebpb
Csrnp1					csrnp1			csrnp1				csrnp1
Dusp1			dusp1
Dusp4			dusp4					dusp4
Egr1					egr1			egr1				egr1	egr1
Egr2					egr2			egr2			egr2	egr2	egr2
Fos			fos					fos				fos	fos
Gadd45b			gadd45b
Jun			jun		jun			jun				jun
Junb					junb			junb
Kdm6b								kdm6b
Klf4					klf4			klf4				klf4
Nnat													nnat
Nr4a1			nr4a1		nr4a1			nr4a1				nr4a1
Nr4a2					nr4a2			nr4a2			nr4a2	nr4a2	nr4a2
Pim3		pim3
Plk2		plk2
Rrad							rrad
Slc39a6
Ssfa2
Stk40		stk40						stk40
Tiparp
Utrn							utrn
Avpr1a						avpr1a	avpr1a		avpr1a
Avpr2						avpr2	avpr2						avpr2
Brs3						brs3	brs3
Cul5
Gabbr2				gabbr2		gabbr2	gabbr2
Gabra1						gabra1	gabra1			gabra1
Gria1				gria1		gria1	gria1			gria1
Gria2				gria2		gria2	gria2			gria2
Gria4				gria4		gria4	gria4			gria4
Grin1				grin1		grin1	grin1		grin1	grin1		grin1	grin1
Grin2c				grin2c		grin2c	grin2c		grin2c	grin2c
Grm1				grm1		grm1	grm1		grm1
Grm5				grm5		grm5	grm5		grm5
Grpr						grpr	grpr		grpr
Nmbr						nmbr	nmbr
Slc12a4										slc12a4
Slc12a5							slc12a5			slc12a5
Slc12a6							slc39a6			slc39a6
Slc12a7										slc12a7
Vipr2						vipr2	vipr2
Calb1
Camk2a		camk2a					camk2a		camk2a	camk2a
Camk2b		camk2b							camk2b	camk2b
Creb1					creb1			creb1			creb1	creb1	creb1
Crebbp					crebbp			crebbp				crebbp
Crem					crem			crem
Map2k1		map2k1	map2k1								map2k1		map2k1
Map3k1		map3k1	map3k1
Mapk1		mapk1	mapk1										mapk1
Mapk3		mapk3	mapk3										mapk3
Nras			nras				nras
Ppp1ca								ppp1ca
Ppp2ca							ppp2ca	ppp2ca
Prkaca		prkaca	prkaca				prkaca	prkaca	prkaca
Prkacb		prkacb	prkacb					prkacb	prkacb
Prkca		prkca	prkca				prkca		prkca
Prkcb		prkcb	prkcb						prkcb	prkcb
Prkcc		prkcc	prkcc						prkcc
Prkg1		prkg1
Prkg2		prkg2									prkg1
Rasa1		rasa1					rasa1
Rasa2		rasa2					rasa2
Rasa3
Rasd1							rasd1	rasd1
