# Supplementary material for: Integrative Gene Regulatory Network Analysis Reveals Light-Induced Regional Gene Expression Phase Shift Programs in the Mouse Suprachiasmatic Nucleus
Source: PLoS One. 2012 May 25;7(5):e37833. doi: 10.1371/journal.pone.0037833 (PMC3360606; doi:10.1371/journal.pone.0037833)
Supplement: Table S4 — List of identified TREs and results of enrichment analysis. TRE names and consensus sequences are listed. Three sets of Fisher Exact Test results are shown. 1) TREs in all 89 analyzed genes, using entire mouse genome as background. 2) TREs in the light-induced genes, using entire mouse genome as background. 3) TREs in the light-induced gene set, using the promoters of the 89 genes as background. Significant scores (p<0.05) are highlighted in bold. Empty spot indicate a particular TRE is not present in the light-induced genes. (XLS) [file pone.0037833.s009.xls]

## Sheet: promoter_TRE frequencies
				Probability (FET p value)
TRE\ExternalGroup	Recognition Sequence	TRE Family	All 89 genes (mouse genome as background)	Light induced genes (mouse genome as background)	Light induced genes (89 genes as background)
$AP1_Q2_01	TGACTCANNSKN	AP1	0.99998	0.98992	0.56307
$AP1_Q4_01	TGAGTCAN	AP1	0.92255	0.91185	0.8136
$AP2_Q6	MKCCCSCNGGCG		0.00029	0.10639	0.82327
$AP2_Q6_01	SNNNCCNCAGGCN		0.17039	0.13979	0.30948
$AP2ALPHA_01	GCCNNNRGS		0.04487	0.07095	0.3543
$AP4_01	WGARYCAGCTGYGGNCNK		0.95942	0.83641	0.54617
$AR_Q2	AGWACATNWTGTTCT		0.9958	0.93099	0.55044
$AREB6_02	WNWCACCTGWNN		0.93543	0.91995	0.8136
$ATF6_01	TGACGTGG		0.4808	0.32103	0.3543
$AHRHIF_Q6	NRCGTGNGN		0.24615	0.4102	0.6421
$AHR_Q5	NTNGCGTGNNN		0.05049	0.44471	0.33708
$AHRARNT_01	KNNKNNTYGCGTGCMS		0.82568
$ARNT_01	NDDNNCACGTGNNNNN	Ebox	0.90595	0.93878	0.87939
$BCL6_Q3	NKTTCTAGGW		0.99966	0.98893	0.70522
$BRCA_01	KTNNGTTG		1	0.99956	0.54453
$CEBP_Q3	NNNTKNNGNAAN		0.97578	0.86746	0.54617
$CEBPA_01	NNATTRCNNAANNN		0.95631	0.60847	0.2086
$CEBPDELTA_Q6	MATTKCNTMAYY		0.98844	0.88832	0.56307
$CEBPGAMMA_Q6	CTBATTTCARAAW		0.99968	0.99097	0.75431
$CACD_01	CCACRCCC		0.99924	0.96386	0.55044
$CBF_02	NNNNNTGYGGTYNNNN		0.591	0.1428	0.11108
$CDPCR1_01	NATCGATCGS		0.43167	0.42932	0.55044
$CDPCR3_01	CACCRATANNTATBG		0.99999
$CDP_02	NWNATCGATTANYNN		0.54056	0.62057	0.71374
$CIZ_01	SAAAAANNN		0.76206	0.38338	0.33708
$CKROX_Q2	SCCCTCCCC	EGR	0.00088	0.16399	0.85759
$COUP_DR1_Q6	TGACCTTTGACCC		0.99279
$CP2_02	GCTGGNTNGNNCYNG		0.06123	0.5711	0.9152
$CREB_02	CNNTGACGTMA	CREB	0.00045	0.00149	0.13967
$CREB_Q4_01	NNGNTGACGTNN	CREB	0.00083	0.00093	0.08893
$CART1_01	NNNTAATTNNCATTANCN		0.99999
$CDXA_02	AWTWMTR		1	0.99987	0.54433
$CRX_Q4	YNNNTAATCYSMN		1	0.99496	0.26175
$DBP_Q6	AGCAHAC		1	0.99988	0.67431
$DEAF1_02	RNNNRTTCGGGNRTTTCCGGRRNKN		0.22679
$E2F_03	TTTSGCGCGMNR	E2F	0.0526	0.00492	0.03641
$E2F_Q6_01	NKCGCGCSAAAN	E2F	0.09884	0.02116	0.09618
$E4BP4_01	NRTTAYGTAAYN		0.23197
$EBF_Q6	KTCCCYWGRGA		0.72895	0.58299	0.56307
$ER_Q6	NNARGNCANNNTGACCYNN		0.99978	0.94657	0.32331
$ETF_Q6	GVGGMGG		0	1e-05	0.5589
$EBOX_Q6_01	NCACSTGNCN	Ebox	0.15787	0.12307	0.32331
$EGR1_01	WTGCGTGGGCGK	EGR	0.13735	0.02859	0.10933
$ETS_Q6	ACTTCCTS		0.9867	0.97888	0.87939
$FAC1_01	NNNCAMAACACRNA		0.99996	0.98331	0.4603
$FXR_Q3	CARGKTSAWTRACC		0.99525
$GABP_B	VCCGGAAGNGCR	GABP	0.64684	0.04836	0.01082
$GATA4_Q3	AGATADMAGGGA		0.99877	0.97626	0.71374
$GATA_C	NGATAAGNMNN		1	0.99549	0.11108
$GLI_Q2	NBTGGGTGGTCN		0.73031	0.35681	0.33708
$GRE_C	GGTACAANNTGTYCTK		0.99537	0.96826	0.72382
$GFI1_Q6	NNAAATCANNGSN		0.99207	0.90355	0.56307
$HFH1_01	NATTGTTTATWT		1	0.99634	0.56307
$HIC1_02	NSNNNNTGCCCSSNN		0.02168	0.40631	0.87557
$HIF1_Q3	GNNKACGTGCGGNN		0.27412	0.18192	0.32331
$HLF_01	GTTACRYAAT		0.9015
$HMGIY_Q6	GGAAAWT		1	0.99938	0.55044
$HNF1_Q6	WRGTTAATNATTAACNNN		0.99979	0.98864	0.32331
$HNF3ALPHA_Q6	TRTTTGYTYWN		1
$HNF3B_01	KGNANTRTTTRYTTW		1	1	0.98764
$HNF4_Q6_01	NGGNCAAAGKYCAN		0.9996	0.9688	0.56307
$HNF4ALPHA_Q6	VTGAACTTTGMMB		0.99838
$HOXA7_01	YCAATCT		0.99872	0.93642	0.43824
$HSF1_01	RGAANRTTCN		0.96703
$HAND1E47_01	NNNNGNRTCTGGMWTT		1	0.99503	0.42394
$IPF1_Q4	GHNNTAATGACM		1	0.99975	0.54409
$IRF2_01	GAAAAGYGAAASY		0.38773
$ISRE_01	CAGTTTCWCTTTYCC		0.38872
$KROX_Q6	CCCGCCCCCRCCCC	EGR	1e-05	0.01258	0.67157
$KID3_01	CCACN		0.27201	0.64504	1
$LEF1TCF1_Q4	MCTTTGWWSNY		0.99998	0.99702	0.75431
$LRF_Q2	VNNRMCCCC		0.01107	0.00636	0.09695
$LRH1_Q5	NNRRCCTTGVAN		0.98748	0.92861	0.6421
$LXR_Q3	TGGGGTYACTNNCGGTCA		0.77763	0.83889	0.8136
$LMO2COM_01	CNNCAGGTGBNN		0.39337	0.17596	0.26175
$MAF_Q6_01	NGCTGAGTCAN		0.998	0.99962	0.9885
$MAZ_Q6	GGGGAGGG		0.00022	0.04057	0.67183
$MEF2_03	NNNNNWKCTAWAAATAGMNNNN		0.66162	0.18265	0.09618
$MEIS1BHOXA9_02	TGACASTTTWAYRR		0.99866	0.97169	0.6421
$MRF2_01	AWSCACAATACNVA		0.999	0.97817	0.71374
$MYB_Q3	NNNGNCAGTTN		0.99999	0.99647	0.62986
$MINI19_B	NNNNGVCNCCAYNCMRSNGSM		0.6088	0.27099	0.33708
$MYOD_Q6_01	CNGNRNCAGGTGNNGNAN		0.78683
$NF1_Q6_01	NTGGNNNNNNGCCAANN		0.72912	0.6293	0.54453
$NFY_01	NNNRRCCAATSRGNNN		0.68713	0.46766	0.41416
$NFY_Q6_01	NNNNRRCCAATSR		0.36007	0.38632	0.55044
$NFKB_Q6_01	NNNNKGGRAANTCCCN		0.52894	0.45162	0.56307
$NRSF_Q4	GYRCTGTCCRYGGTGCTGA		0.06013
$NKX22_01	TTAAGTRSTT		0.57685
$NKX25_Q5	TSYCACTTSM		1	0.9994	0.7716
$OG2_01	TAATTR		1	0.99999	0.85168
$OCT1_07	TNTATGBTAATT		0.95129
$OCT1_Q5_01	TNATTTGCATW		0.8866	0.51338	0.26175
$OCT_Q6	TNATTTGCATN		0.99547	0.79496	0.20975
$PEBP_Q6	GNTNACCACARANNK		0.99595	0.96117	0.71374
$PLZF_02	KTNNWTNGNNGNTAAAGYTTKATYWGTTC		1	0.99988	0.8136
$POU1F1_Q6	ATGAATAAWT		0.99998	0.97288	0.33708
$POU3F2_02	TTATGYTAAT		1
$POU6F1_01	GCATAAWTTAT		0.81436
$PPAR_DR1_Q2	TGACCTTTGNCCY		0.73171	0.75543	0.70522
$DR1_Q3	RGGNCAAAGGTCA		0.96941	0.83579	0.56307
$PPARA_01	CARAACTAGGNCAAAGGTCA		0.99992	0.96679	0.3543
$PPARA_02	NNRGGTCATWGGGGTSANG		0.76027	0.83112	0.8136
$PPARG_01	NNWGRGGTCAAAGGTCANNNN		0.73745	0.61851	0.55044
$PAX2_01	NNNNGTCANGNRTKANNNN		0.93128	0.91728	0.8136
$PAX3_B	NNNNNNCGTCACGSTYNNNNN	PAX3	0.07464	0.01011	0.04211
$PAX4_04	RAAAAWTANNNNNNNNNNNNNNYCACNCC		0.99977	0.96808	0.45143
$PAX5_02	RRMSWGANWYCTNRAGCGKRACSRYNSM		0.13686	0.67573	0.91351
$PAX6_Q2	CTGACCTGGAACTM		1	0.99823	0.72382
$PAX8_01	NNNTNNNGNGTGANN		0.226	0.69061	0.88665
$PBX1_03	NNATCAATCANN		0.99877	0.80058	0.11108
$PBX_Q3	GATTGATKGNNS		0.99999	0.94618	0.11108
$R_01	NNGKCCNCSNRNYGTGGTGCN		0.07033
$RBPJK_Q4	TTCCCACK		0.76289	0.23508	0.11108
$RFX_Q6	SHGTTGCSN		0.99998	0.99961	0.91855
$RFX1_02	NNGTNRCNATRGYAACNN		0.50603	0.41437	0.45143
$RORA_Q4	WAANTRGGTCA		0.70629
$RSRFC4_Q2	ANKCTAWAAATAGMHYN		0.64617	0.16755	0.11108
$RUSH1A_02	NNMCWTNKNN		0.9983	0.92023	0.41416
$S8_01	WNNANYYAATTANCNN		0.99204
$SF1_Q6_01	TGACCTTGN		0.94496	0.92635	0.8136
$SMAD3_Q6	TGTCTGTCT		0.99997	0.99912	0.88665
$SOX9_B1	NNNNAACAATRGNN		0.99994	0.99882	0.88665
$SREBP_Q3	VNNVTCACCCYA		0.99556	0.98891	0.87557
$SREBP_Q6	NNNNYCACNCCANNN		0.97464	0.99615	0.98023
$SRF_C	DCCWTATATGGNCWN	SRF	0.07091	0.00401	0.03575
$SRF_Q4	SCCAWATAWGGMNMNNNN	SRF	0.01594	0.01357	0.26175
$SRF_Q6	GNCCAWATAWGGMN	SRF	0.11457	0.01628	0.11108
$STAT_Q6	NNNNNTTCTKGGA		0.9995	0.89313	0.20975
$STAT1_01	NNNSANTTCCGGGAANTGNSN		0.47545	0.7047	0.8136
$SZF11_01	CCAGGGTAWCAGCNG		0.63296	0.77238	0.77651
$SP1_Q2_01	CCCCGCCCCN		0	0.00773	0.66924
$SP3_Q3	ASMCTTGGGSRGGG		0.4703
$SPZ1_01	DNNGGRGGGWWNNNN		0.10037	0.16	0.41902
$STAF_02	MNTTCCCAKMATKCMWNGCRA		0.96328
$STRA13_01	NYSTCACGTGABNN		0.39545
$TBP_Q6	TTTATAN		0.99962	0.9437	0.3543
$TBX5_01	NNAGGTGTNANN		0.99994	0.98728	0.54409
$TCF11_01	GTCATNNWNNNNN		0.88998	0.51441	0.22464
$TFE_Q6	TCATGTGN		0.98085
$TGIF_01	AGCTGTCANNA		0.51294
$TTF1_Q6	NNNNCAAGNRNN		0.97477	0.9314	0.72382
$TAL1BETAE47_01	NNNAACAGATGKTNNN		1	0.99997	0.82369
$TAXCREB_01	GGGGGTTGACGYANA	CREB	0.00896	0.0024	0.0683
$TAXCREB_02	RTGACGCATAYCCCC	CREB	0.02576	0.00547	0.0683
$TEL2_Q6	YTACTTCCTG		0.88945	0.96941	0.94072
$USF_Q6_01	NRCCACGTGASN		0.14674	0.68408	0.91351
$DR3_Q4	RRTGNMCYTNNTGAMCCNYNT		0.86694	0.94945	0.91351
$VDR_Q3	GGGKNARNRRGGWSA		0.46963	0.29	0.30948
$WT1_Q6	SMCNCCNSC		0.0007	0.00397	0.18555
$YY1_Q6	GCCATNTTN		0.99998	0.88035	0.05635
$YY1_Q6_02	NYNKCCATNTT		0.99996	0.94787	0.2086
$ZF5_B	NRNGNGCGCGCWN		0	0	0.38896
$ZID_01	NGGCTCYATCAYC		0.55058	0.23612	0.33708
$ZNF219_01	CRCCCCCCNCCC		0.87095
$CETS1P54_03	NNNRCCGGAWRYNNNN		0.05061	0.0679	0.29351
$CETS1P54_02	NNACMGGAWRTNN		0.33329	0.38238	0.54617
$CMAF_01	NWNNNTGCTGACKNNNNNN		0.99608	0.98034	0.79105
$MYCMAX_03	NNNNNNNCACGTGNNNNNNN	Ebox	0.14034	0.27085	0.54723
$MYOGNF1_01	CRSCTGTBBNNTTTGGCACBSNGCCARCH		0.2957	0.60202	0.79105
$P53_02	NGRCWTGYCY		0.73309	0.72734	0.71374
$VMYB_02	NSYAACGGH		0.05078	0.15705	0.50403
