# Supplementary material for: Integrative Gene Regulatory Network Analysis Reveals Light-Induced Regional Gene Expression Phase Shift Programs in the Mouse Suprachiasmatic Nucleus
Source: PLoS One. 2012 May 25;7(5):e37833. doi: 10.1371/journal.pone.0037833 (PMC3360606; doi:10.1371/journal.pone.0037833)
Supplement: Table S7 — Normalized qPCR data and Standard error analysis. Raw data from BioMark were normalized (−ΔΔCT). Average and SEM of each animal group are also shown. (XLS) [file pone.0037833.s012.xls]

## Sheet: DeltaCt
	ZT 6																ZT 15																		ZT 15 L
	Core					Shell					Outside						Core						Shell						Outside						Core						Shell						Outside
	811C	813C	814C	815C	816C	811S	812S	813S	814S	815S	811O	812O	813O	814O	815O	816O	821C	822C	823C	824C	825C	826C	821S	822S	823S	824S	825S	826S	821O	822O	823O	824O	825O	826O	831C	832C	833C	834C	835C	836C	831S	832S	833S	834S	835S	836S	831O	832O	833O
Clk	-5.91624	-4.91548	-4.70661	-4.33709	-4.61194	-4.83778	-5.01532	-4.6599	-4.58889	-5.67959	-5.93616	-5.54834	-4.89676	-4.30106	-5.5697		-3.80143	-5.08994	-4.95807	-3.89235	-3.90456	-3.92617	-5.29705	-3.91221	-4.64554	-4.38433	-3.78814	-3.59033	-5.34846	-4.63388	-5.09522	-4.88321	-5.38259	-4.73693	-4.88821	-4.39296	-3.98923	-3.83051	-3.7388	-4.00349	-4.47511	-5.13194	-4.19846	-4.44007	-4.5963	-4.21747	-6.77412	-5.86333	-5.61475
Npas2	-5.48742	-6.32614	-7.51359	-6.14042	-8.30788	-6.82182	-7.01869	-5.49282	-5.67774	-5.3887	-6.53071	-6.14356	-7.0867	-5.95678	-7.46816	-6.92696	-6.92958	-7.95077	-6.94903	-7.06549	-7.22763	-6.32236	-5.79962	-5.59081	-6.37158	-6.14106	-6.10777	-6.3959	-7.23749	-4.64184	-6.85099	-7.19503	-7.58056	-7.81951	-6.96507	-6.17425	-7.0033	-6.0741	-7.14436	-7.97498	-5.33408	-6.06119	-6.81589	-5.76738	-6.49307	-5.67184	-7.88163	-6.01031	-7.27817
Bmal1	-5.83091	-4.60904	-5.32889	-4.58456	-4.75633	-3.93255	-3.72409	-3.98115	-4.41959	-5.28453	-5.71636	-5.08883	-5.34368	-4.80952	-5.07021	-4.13176	-2.84071	-3.4992	-3.14224	-3.2125	-2.73327	-3.58216	-4.02765	-3.2984	-2.52443	-3.06093	-2.3844	-2.58946	-4.98302	-4.98508	-4.93926	-4.95357	-4.92816	-5.26403	-4.07398	-3.52714	-2.73403	-2.45346	-3.30562	-3.10965	-3.06379	-4.09575	-2.91815	-2.91408	-2.87063	-3.13661	-5.74867	-4.70766	-4.8375
Per1	-6.11737	-4.9019	-4.94278	-5.60105	-5.1152	-5.29719	-5.23959	-4.73418	-4.81881	-5.66084	-5.84841	-5.73875	-6.41132	-5.72739	-6.29624	-5.84728	-5.30273	-5.49985	-5.92499	-5.13196	-5.81886	-6.63202	-5.99475	-5.44017	-4.85569	-5.35652	-5.80555	-5.99117	-6.93423	-5.11913	-5.43891	-4.87361	-5.53052	-6.99097	-4.64272	-4.79386	-4.41188	-4.11358	-4.31948	-4.83382	-4.96399	-5.1629	-5.57424	-5.17333	-5.83376	-5.65656	-5.12684	-5.44835	-6.02839
Per2	-3.79613	-4.16426	-4.3108	-3.60045	-4.43362	-3.29122	-3.74255	-3.47882	-3.54902	-3.49251	-5.51057	-6.0194	-6.60574	-6.50609	-6.50037	-5.81648	-2.82954	-3.11856	-3.82694	-3.33664	-3.76253	-3.36941	-3.26352	-3.70841	-2.86149	-3.64665	-3.58266	-3.25465	-5.75471	-4.93334	-5.65425	-4.18475	-5.4936	-6.34756	-2.47055	-2.61227	-2.49746	-2.5325	-3.05699	-2.87406	-2.96013	-3.47656	-2.94259	-3.19489	-3.0918	-3.13276	-4.73308	-3.91861	-5.26686
Per3	-5.33526	-6.29082	-5.94872	-6.14791	-6.32284	-5.50232	-6.31193	-6.40104	-6.3282	-6.52679	-7.36175	-7.08361	-7.45499	-6.87217	-7.97767	-6.90188	-5.86801	-6.35012	-6.24353	-5.90305	-6.89501	-5.9769	-7.04322	-6.19005	-5.83418	-6.23458	-6.60276	-7.311	-7.58479	-6.20467	-6.40494	-6.0131	-6.5098	-7.64353	-5.6353	-5.18288	-4.74816	-5.55026	-6.47947	-6.90377	-6.2237	-6.35788	-5.87741	-6.77224	-7.46114	-6.8165	-6.42786	-6.11846	-6.69621
Cry1	-3.33607	-3.0136	-4.17779	-4.13644	-4.20675	-3.13939	-3.56409	-3.13777	-3.57988	-3.52327	-4.78888	-4.7142	-5.32455	-5.61156	-5.03915	-5.27849	-3.2556	-2.79118	-3.56527	-3.04307	-2.98899	-2.34229	-3.96639	-3.52061	-2.90151	-3.39526	-2.49102	-2.71898	-5.11891	-4.1895	-4.47273	-3.77932	-4.35331	-4.5904	-2.48735	-3.26053	-3.03504	-2.17742	-3.43789	-2.90499	-3.1239	-3.86641	-2.8692	-3.27605	-2.81505	-3.0835	-5.28358	-3.93195	-4.0817
Cry2	-1.75386	-2.03282	-2.36214	-3.31436	-3.15334	-2.5326	-2.63996	-2.34735	-2.50984	-2.34936	-2.4524	-2.46828	-3.23898	-2.79971	-3.52933	-2.8259	-2.14586	-3.36764	-2.87878	-1.54049	-2.68787	-2.82493	-2.62283	-2.75386	-2.02231	-2.25342	-1.22817	-2.46024	-3.41639	-1.92124	-2.88697	-2.56025	-2.89792	-2.83072	-1.90711	-2.19935	-2.05235	-2.17076	-2.83361	-3.06095	-2.10286	-2.11344	-2.83644	-2.55976	-3.02357	-2.61302	-2.81034	-2.53357	-2.98908
Nr1d1	-1.46763	-1.45765	-1.96168	-1.59284	-1.69731	-1.39664	-1.5975	-1.32918	-1.43714	-1.45203	-3.29587	-3.0657	-3.24164	-3.06289	-3.49705	-2.45952	-3.63001	-4.01616	-3.77003	-3.21317	-3.83054	-3.62669	-3.6236	-3.89608	-3.52202	-2.99087	-3.4082	-3.09591	-4.34955	-2.83246	-3.71037	-3.38001	-4.20052	-4.02898	-4.05642	-3.84276	-3.4929	-2.91341	-3.38147	-3.36362	-2.99911	-3.86593	-3.59005	-3.53107	-4.02781	-3.46792	-4.78643	-3.88312	-4.58236
Nr1d2	-4.35055	-3.2489	-3.46028	-3.02692	-3.35563	-2.71072	-3.37828	-3.00465	-3.11588	-3.64909	-3.86376	-3.68275	-3.47721	-3.37933	-3.8635	-3.62072	-4.00798	-4.2232	-4.1135	-3.39755	-4.03537	-4.07403	-3.92603	-4.07243	-3.96443	-3.73781	-3.82752	-4.15204	-3.92596	-3.25463	-3.48176	-3.73631	-3.559	-4.04999	-3.60992	-3.62778	-3.45823	-3.82655	-3.62345	-3.85328	-3.44536	-4.62402	-4.51075	-3.96543	-4.31806	-4.01503	-4.20863	-3.80718	-4.40439
Rora	-1.30965	-1.99132	-2.1901	-1.78895	-1.57983	-0.403037	-0.886447	-1.02614	-1.4582	-0.934481	-3.3581	-4.23303	-4.0479	-2.76482	-4.37145	-3.69175	-1.71303	-2.24413	-1.88034	-1.62722	-1.9519	-2.28503	-1.49992	-2.00254	-2.30818	-1.9645	-1.08296	-1.61021	-4.36968	-4.26247	-4.34541	-3.71944	-4.10854	-4.35188	-1.89461	-1.40044	-1.41594	-1.25352	-1.27362	-1.29541	-1.19433	-2.3336	-0.85998	-1.59979	-0.926411	-1.35371	-4.111	-3.96105	-4.5579
Rorb	-4.05133	-3.3158	-3.77771	-4.37447	-4.18238	-1.96427	-2.76259	-2.00176	-2.83963	-2.8387	-5.49606	-5.38566	-6.23374	-5.75696	-6.61847	-5.86702	-3.87121	-4.09704	-4.38552	-4.25313	-3.97254	-4.31779	-3.79783	-3.7998	-3.60377	-3.6575	-3.28594	-3.0758	-6.06219	-6.30042	-5.96172	-5.27682	-6.2508	-5.57395	-4.77568	-3.95836	-3.943	-3.20553	-4.18811	-4.12334	-3.12301	-4.67295	-3.86037	-3.66045	-3.16984	-3.53357	-7.3645	-5.7414	-5.92604
Csnk1e	-4.48469	-4.10941	-4.36447	-4.32511	-4.53683	-3.78285	-4.524	-4.12094	-4.13537	-4.44246	-4.03134	-3.74565	-4.28113	-4.29445	-4.70792	-4.56527	-4.28276	-4.57833	-3.8505	-3.72464	-4.22603	-4.20161	-4.47055	-4.36547	-3.92152	-4.20795	-4.35191	-4.32299	-4.20124	-3.91808	-4.09589	-3.82445	-4.12614	-3.93607	-4.25669	-3.77865	-3.73512	-3.45071	-3.54609	-4.34898	-3.94282	-4.55623	-4.62266	-4.47983	-4.46827	-4.04089	-4.66714	-4.43451	-4.24075
Csnk1d	-2.28432	-2.2276	-2.31356	-2.49102	-2.15051	-2.52192	-1.91817	-2.15554	-1.68014	-2.38441	-2.51398	-2.02502	-2.24407	-2.17814	-2.75107	-2.26264	-2.03942	-2.12012	-2.26061	-1.63963	-1.87587	-2.0953	-2.67127	-2.0424	-1.84706	-1.29097	-1.23772	-1.20937	-2.70075	-2.10371	-1.55161	-2.0173	-1.67477	-1.52143	-2.08312	-2.05428	-1.81943	-1.57232	-1.35834	-2.07011	-1.97591	-2.40911	-2.04805	-2.12393	-2.05776	-1.9164	-2.66842	-1.76829	-2.2401
Vip	-0.810645	-1.28643	-1.69467	-1.4009	-0.414558	-3.82945	-6.88043	-5.66752	-7.24323	-6.36411			-9.55147	-9.87626	-9.21733	-6.35105	-1.63325	-2.01896	0.570368	-0.989234	-0.283771	-0.921147	-6.87882	-6.31929	-5.72996	-4.26483	-3.81021	-4.97635	-10.4011	-9.54208	-11.6314	-11.1791	-8.52521	-10.2212	-2.30714	-2.89463	-1.2029	-0.5419	-0.809963	-1.64465	-6.33491	-9.72539	-4.96703	-4.81028	-4.09259	-5.96414	-9.61603	-9.87538	-10.1299
Avp		-1.38552	-1.43791	-1.77414	-1.66444	2.11445	1.35903	1.28996	0.656667	0.833761	-2.86342	-9.26065	-6.0451	-4.07152	-3.60594	-3.72371	0.0326158	-0.695734	-1.55985	-2.13425	0.00468073	-1.71139	-1.63761	-1.70053	-0.988721	-0.744326	0.4865	-0.437327	-3.09804	-1.33327	1.73757	-2.71716	1.15539	-1.07295	-2.53676	-2.36236	-1.61135	-1.45844	0.708968	-0.252661	0.518852	1.37248	-0.624552	-0.770681	-0.0986875	-0.215236	-6.27181	0.48965	-6.50304
Grp	-1.43566	-1.31495	-1.1224	-1.01667	-0.296151	-1.12805	-2.95903	-2.85874	-3.35649	-3.49363	-6.04933	-5.55241	-6.93951	-6.15304	-5.50259	-5.73639	-1.39892	-1.95347	-1.00237	-0.620339	-0.209392	-0.745332	-4.46996	-3.51536	-3.383	-2.94828	-2.32087	-2.4323	-6.70787	-6.37279	-5.46742	-6.96876	-4.2791	-4.59479	-1.33762	-1.89711	-0.756894	0.0595776	-0.707763	-1.51296	-3.50709	-3.49332	-2.48896	-2.76658	-2.6009	-3.61221	-6.51111	-4.17857	-6.44265
Gsk3b	-2.29629	-2.30005	-2.43715	-2.83926	-2.28359	-2.58267	-2.16286	-2.24643	-2.23492	-2.14937	-2.33285	-2.14247	-2.30656	-1.46481	-2.74988	-2.34214	-2.51356	-2.20568	-2.50256	-1.64148	-2.29961	-2.3882	-2.44181	-2.4173	-2.43413	-2.26664	-2.16659	-2.41883	-2.66901	-2.12102	-2.32847	-2.20372	-2.21634	-2.22686	-2.31291	-2.5379	-2.13746	-2.05209	-2.10343	-2.63743	-2.32472	-2.92562	-2.94983	-2.34237	-2.31317	-2.282	-2.97111	-2.43151	-2.80854
Bhlhe40	-3.17136	-3.42535	-3.05432	-3.01748	-3.9926	-3.26824	-3.3526	-2.85749	-3.07827	-3.2449	-3.23105	-2.92278	-3.16673	-3.03835	-3.14958	-2.99925	-3.71362	-4.05249	-3.28622	-2.58339	-4.44335	-4.37536	-2.9404	-3.64718	-3.24841	-3.47928	-3.92772	-4.01631	-3.3114	-3.4284	-3.69526	-2.69182	-2.95152	-3.11832	-2.93834	-3.61088	-3.26106	-3.12791	-2.56131	-3.96332	-3.27166	-3.29899	-4.0304	-3.76263	-3.07246	-3.5692	-3.61719	-3.15214	-3.5492
Egr1	-3.88373	-4.05293	-3.88178	-4.94768	-5.93788	-4.94157	-5.48391	-4.25457	-3.34492	-4.05105	-4.46882	-4.90016	-3.8907	-3.25846	-4.07518	-3.32708	-4.08028	-4.74843	-4.2858	-4.1571	-5.3075	-5.05598	-4.36734	-4.27436	-3.64245	-3.55849	-4.80269	-4.52533	-4.61767	-1.11757	-3.83573	-4.42541	-4.69972	-4.21537	-1.89843	-2.16279	-1.21133	-0.00261707	-0.350578	-1.27623	-3.19429	-3.34749	-3.20226	-3.35965	-2.86891	-2.8292	-3.66686	-3.51963	-4.49436
Nr4a1	-9.47454	-7.19739	-7.55788	-6.48977	-7.07615	-7.32253	-6.38124	-6.24522	-6.82473	-8.62142	-9.11634	-8.82089	-9.04332	-6.60773	-8.53124	-7.4289	-7.36445	-8.41677	-8.41409	-6.95636	-6.94037	-7.5028	-7.81683	-6.61521	-6.89385	-6.76714	-6.27915	-6.42694	-9.05575	-5.81359	-7.04707	-8.12104	-8.66512	-9.19313	-5.63982	-5.20317	-5.59544	-4.21484	-5.12706	-5.75447	-7.56409	-8.60094	-7.71766	-6.2037	-6.40394	-6.67208	-6.98888	-7.77129	-8.54858
Egr2	-8.31881	-8.35064	-8.91995	-10.6509	-10.3758	-10.5974	-9.57131	-8.68912	-8.55675		-10.3637	-9.76731	-9.39792	-8.7699	-8.85088	-7.60844	-8.57185	-11.291	-7.73442	-8.32223	-8.94043	-11.1292	-10.8465	-9.78484	-9.2246	-8.5976	-8.44728		-10.678	-6.50735	-8.08778	-11.3927		-9.44463	-6.3134	-6.34769	-5.7491	-5.2516	-5.51821	-5.87318	-7.35753	-9.44772	-8.48349	-9.90738	-7.64051	-8.50776	-8.02758		-9.01576
Dusp1	-3.48979	-3.10888	-3.73383	-4.0663	-3.70043	-2.69197	-3.23245	-2.45457	-2.90242	-2.73328	-4.74699	-4.53572	-4.67975	-3.97066	-4.22128	-4.6724	-4.29964	-5.31683	-3.80454	-3.82077	-4.4783	-5.26371	-4.41028	-4.64933	-4.18574	-4.21223	-4.20267	-4.58754	-4.55872	-4.42393	-3.97368	-3.74803	-4.02329	-5.24572	-2.96282	-3.42391	-2.93208	-2.44763	-1.79423	-3.31697	-3.10619	-4.01185	-3.56703	-3.69517	-3.28407	-3.70251	-3.84905	-3.22089	-4.71863
Rrad	-7.29072	-5.23288	-5.51924	-5.37886	-5.26177	-5.43973	-5.60945	-6.41471	-5.42397	-6.44299	-6.99789	-5.43493	-6.22781	-6.4132	-5.3734	-5.63121	-5.1577	-6.36224	-5.3722	-5.34365	-4.58316	-5.91726	-6.39365	-6.25287	-5.46279	-5.22167	-5.57657	-5.17914	-5.94647	-5.80813	-5.97479	-5.88402	-6.54664	-7.03761	-3.10134	-3.18734	-2.12842	-1.61497	-2.11455	-2.36547	-4.27034	-5.84853	-3.99936	-4.57151	-4.48088	-5.17847	-6.1482	-5.13585	-7.02678
Pim3	-4.80841	-4.83248	-4.75716	-4.7736	-5.79728	-4.71224	-4.26874	-4.37958	-4.45464	-4.54123	-4.39827	-4.25069	-4.78063	-4.18944	-4.09867	-4.01612	-4.80376	-4.72288	-4.6369	-4.67152	-4.45096	-5.28812	-5.08596	-5.02175	-4.4718	-4.75609	-4.52266	-4.20145	-4.38077	-4.41826	-4.27556	-4.47605	-3.62228	-3.94888	-3.95967	-4.52743	-4.00971	-3.6556	-3.98773	-4.53809	-4.8298	-4.63364	-4.76044	-4.53664	-4.6049	-4.78338	-4.46166	-3.8817	-4.15002
Klf4	-7.21995	-7.64671	-6.82839	-7.14213	-8.06907	-7.86809	-7.81153	-7.85484	-6.44424	-8.37756	-7.24908	-7.73508	-6.58005	-6.5787	-6.65801	-6.35817	-6.93975	-7.62207	-8.40314	-7.56528	-8.35067	-8.06439	-7.34396	-7.54501	-7.79958	-7.42361	-8.11588	-10.1476	-7.03701	-6.6671	-7.17563	-6.51771	-6.23335	-8.11768	-6.12782	-6.80142	-7.33033	-5.71483	-5.96507	-7.6502	-7.09674	-7.48208	-7.68194	-6.69497	-7.86225	-7.5683	-6.08372	-6.55159	-9.36639
Fos	-4.56628	-5.28431	-5.73187	-6.1457	-6.03689	-5.11163	-4.98259	-4.68168	-4.89635	-4.35612	-8.00614	-7.24703	-5.97538	-6.77304	-6.72784	-7.08974	-6.34755	-7.04636	-6.26944	-6.36002	-5.95919	-7.38251	-5.67693	-6.06172	-5.39787	-5.69589	-5.64112	-4.09913	-9.01325	-7.60853	-7.26669	-6.27749	-7.70573	-7.87397	-3.41117	-4.72864	-4.54404	-2.95547	-3.55552	-4.36253	-5.3845	-6.29678	-5.42229	-4.9786	-3.42442	-5.23943	-6.92252	-6.40091	-7.29502
Gadd45b	-6.01262	-6.90669	-6.10415	-5.81061	-7.76274	-6.37634	-6.73108	-6.65695	-6.22362	-7.63665	-6.86793	-6.96649	-5.7287	-5.58129	-6.05015	-6.37063	-5.44652	-5.49234	-6.38464	-5.68286	-5.21452	-5.52639	-7.20714	-5.57878	-5.85593	-5.38254	-6.57521	-6.79137	-7.07164	-5.61717	-7.02524	-4.57117	-3.61765	-6.25008	-3.91407	-5.0374	-5.31443	-4.83633	-4.29156	-5.39969	-5.18846	-5.51052	-6.5334	-6.18003	-5.64066	-6.09848	-4.85713	-4.85583	-7.23773
Btg2	-2.75375	-2.92262	-3.62174	-3.56742	-4.06655	-2.47695	-2.65814	-2.46138	-2.73424	-2.45771	-4.37131	-3.81623	-4.05561	-3.65134	-4.37899	-3.47664	-3.59399	-3.90209	-4.33629	-3.75366	-4.15026	-4.04515	-4.12635	-3.78765	-3.24772	-3.26736	-3.60525	-3.36537	-4.42232	-4.45483	-4.00241	-3.98565	-3.20036	-4.95587	-2.47299	-2.45439	-2.43972	-2.01846	-1.62635	-2.25701	-2.39411	-2.99347	-2.52236	-2.71549	-2.11454	-2.78027	-3.70134	-3.21406	-4.16108
Tiparp	-7.98388	-5.6702	-5.81393	-6.28573	-7.22868	-5.86309	-5.84127	-5.12514	-5.61832	-6.25187	-5.83508	-5.45326	-5.21992	-5.3108	-5.03035	-5.49511	-4.99277	-6.4611	-5.76872	-4.86638	-6.05158	-6.77186	-5.64836	-5.75499	-5.4755	-5.03789	-5.83006	-6.04976	-6.01104	-4.65337	-5.43295	-4.36586	-4.44118	-5.55312	-4.91715	-5.39639	-4.63753	-5.0288	-4.14481	-5.66427	-5.31768	-4.8186	-5.87919	-5.75219	-5.85298	-5.18901	-5.09049	-5.4409	-5.06326
Jun	-4.14896	-4.31778	-4.28032	-5.31522	-5.31246	-4.39379	-4.57929	-3.4299	-4.04105	-4.3523	-4.47577	-5.00408	-4.07359	-3.57537	-4.91969	-4.30446	-4.07369	-4.30177	-4.55899	-3.61189	-4.43221	-4.88593	-4.15764	-4.47858	-4.57249	-4.22166	-4.06391	-4.52755	-4.81184	-4.45503	-4.11915	-4.02841	-4.27878	-4.92969	-4.09066	-3.96488	-3.94364	-3.28366	-3.07674	-3.62325	-4.12558	-4.20191	-3.96499	-4.63098	-4.16191	-3.96292	-4.57103	-4.41648	-4.92884
Junb	-5.53679	-3.82666	-4.39834	-4.22502	-4.78056	-4.36622	-4.06553	-3.47988	-4.19707	-4.35357	-5.47205	-5.76626	-5.43715	-5.37451	-4.0337	-4.97045	-4.94965	-5.31404	-4.88181	-5.13139	-5.68465	-5.61208	-5.62024	-5.27924	-4.73483	-4.88303	-5.25581	-4.50841	-6.51213	-3.85145	-4.9627	-5.64814	-5.01688	-6.22553	-2.70455	-3.4928	-2.79637	-2.21826	-1.95169	-2.77267	-4.03893	-4.62658	-4.02246	-4.13625	-3.86217	-4.09472	-5.25431	-4.59665	-5.97861
Cebpb	-5.85597	-5.10158	-4.76497	-5.42438	-6.06111	-5.43223	-4.26225	-4.54363	-4.89887	-5.28786	-5.97698	-5.0576	-5.57706	-4.67964	-5.65444	-5.76492	-4.91122	-4.83921	-6.15141	-4.71561	-5.89726	-6.25562	-6.07348	-6.21732	-5.68133	-5.24305	-5.93309	-5.65163	-5.59348	-5.63556	-5.45831	-4.60168	-3.9175	-5.77349	-3.37583	-3.84859	-4.48103	-3.80573	-3.44442	-4.67467	-5.05777	-4.40477	-5.19615	-4.35473	-5.1945	-5.06932	-4.78306	-4.48505	-5.63537
Nr4a2	-6.12976	-5.05627	-5.39508	-6.08804	-5.27993	-7.22719	-8.5525	-5.9451	-6.13358	-6.21908	-8.07075	-5.93272	-5.80891	-6.09151	-4.46684	-3.23224	-5.14901	-7.06138	-7.27017	-6.07405	-5.2047	-6.85328	-6.23239	-4.32414	-5.69562	-6.68548	-7.01358	-7.72042	-6.31812	-6.41151	-6.76012	-5.16033	-7.13219	-5.64978	-4.79495	-4.09898	-5.2412	-3.65224	-4.41726	-3.78511	-7.60917	-6.17162	-5.41738	-4.96035	-5.77427	-5.85553	-5.72079	-3.8557	-6.67773
Kdm6b	-2.61532	-2.79997	-3.31836	-3.58805	-4.04434	-3.59119	-3.43262	-3.05218	-2.92898	-3.44219	-3.86943	-3.51809	-3.72879	-2.90213	-4.38781	-4.00641	-3.10603	-3.61262	-3.4647	-2.8409	-3.47438	-3.28993	-3.92407	-3.31027	-3.60829	-3.16576	-3.44015	-3.6358	-4.14653	-3.26038	-3.47404	-2.8746	-3.86845	-4.45569	-2.64773	-2.59292	-2.28493	-2.42769	-2.57848	-2.56099	-3.09408	-3.24851	-3.36863	-3.67496	-3.41007	-3.293	-4.35802	-3.16927	-3.80676
Ccnl1	-5.3134	-4.71956	-5.97386	-5.75512	-5.97658	-4.82752	-5.39323	-5.1577	-5.03301	-4.88898	-5.67698	-5.81858	-5.91584	-5.73952	-5.58102	-5.44531	-5.3235	-5.42373	-5.59854	-4.79645	-5.45542	-5.24967	-5.81618	-5.4204	-5.11453	-5.07974	-4.89971	-4.84717	-5.45372	-5.54104	-5.50426	-5.55901	-4.84052	-4.99546	-4.67205	-4.91978	-4.72646	-4.64539	-4.1343	-3.99108	-4.92338	-4.99138	-4.7252	-4.95866	-5.30087	-4.9672	-4.92951	-4.90411	-5.42851
Dusp4	-6.47039	-5.64407	-5.42889	-4.58568	-4.9033	-5.38282	-5.23751	-5.24104	-5.73838	-6.06492	-8.69941	-10.6486	-8.42763	-8.33278	-8.8277	-8.50792	-7.91929	-8.96538	-7.99597	-7.31725	-8.40433	-8.29604	-7.81586	-7.78372	-7.8321	-7.77151	-7.81182	-7.43293	-10.764	-8.77266	-8.86969	-8.31123	-10.6041	-9.98896	-6.37521	-6.33354	-5.89927	-5.0043	-5.66431	-4.66597	-7.47282	-7.69892	-7.27692	-7.30141	-7.30606	-7.41916	-9.09059	-9.15379	-9.55326
Plk2	-2.32131	-1.91006	-3.00521	-2.51716	-2.40725	-1.79664	-2.42914	-2.70262	-2.12958	-2.1353	-4.14825	-3.95097	-3.91239	-3.6335	-3.8519	-3.71808	-3.3819	-4.24827	-3.8263	-3.3107	-3.1564	-3.98788	-4.16626	-3.41835	-3.74087	-2.85385	-2.97505	-2.99061	-4.3017	-1.82268	-3.69737	-3.33254	-3.83354	-3.23253	-3.29243	-2.91193	-2.74974	-2.24916	-2.44667	-3.03176	-3.04377	-3.52993	-3.47095	-2.81833	-3.09314	-3.34024	-4.41438	-3.36642	-4.44148
Stk40	-4.28528	-3.91394	-4.458	-4.87762	-5.00369	-4.23185	-4.52567	-4.03194	-4.46603	-4.0606	-4.42963	-4.59126	-4.45662	-4.27309	-4.31957	-3.67212	-4.60835	-4.80112	-4.86624	-4.04381	-4.45222	-4.32484	-4.97702	-5.10876	-4.93102	-4.52301	-4.48271	-4.41244	-5.05178	-4.76566	-4.72718	-4.33771	-4.07755	-4.20249	-4.00018	-4.38753	-4.02838	-3.70217	-3.67083	-4.21368	-4.32149	-4.3348	-4.57512	-4.03119	-4.61034	-4.30596	-4.22402	-4.15418	-4.61298
Gria1	-2.52623	-0.430421	-0.266111	-1.81039	-1.81532	-1.5644	-1.2888	-0.743423	-1.07182	-1.44252	-1.03562	-0.71953	-1.0916	-0.101743	-0.38744	-0.794701	-1.24762	-1.60829	-1.0811	-1.07815	-1.21498	-1.21615	-1.73362	-0.293517	-0.978856	-0.833055	-0.486458	-0.968042	-0.175652	-0.280914	-0.933379	-0.974817	-0.546344	-0.746613	-1.71741	0.773285	-1.01474	-0.966868	-1.2208	-1.80221	-1.11977	-0.827347	-0.958558	-1.81363	-0.46584	-0.456778	-1.82995	-1.06601	-0.502365
Arih1	-3.53802	-2.53223	-2.74856	-2.99877	-3.48186	-3.35575	-2.90708	-2.95071	-2.87113	-3.04934	-2.71979	-3.04175	-3.0863	-1.99296	-3.36033	-2.6423	-3.00599	-3.30579	-3.32401	-2.44622	-3.00429	-2.9093	-3.32496	-3.20597	-3.07779	-3.00381	-2.46104	-2.87586	-3.21111	-2.81245	-2.77377	-2.89371	-2.56431	-2.80225	-2.34581	-2.90352	-2.69811	-1.97406	-2.84533	-2.9221	-2.45033	-2.9445	-3.53167	-2.57269	-3.01026	-3.20441	-3.16965	-2.8269	-2.84695
Slc39a6	-4.31967	-3.6036	-3.61539	-3.15693	-3.06153	-2.65866	-2.89903	-2.74632	-3.42931	-3.1818	-4.74252	-4.05806	-4.36265	-4.34198	-4.64809	-4.09728	-3.19296	-3.47455	-3.82888	-3.10214	-3.2599	-3.63523	-4.55097	-4.12694	-3.3879	-3.33278	-3.1561	-2.92077	-4.32481	-4.38327	-3.63817	-4.42331	-4.2338	-4.60486	-4.19114	-3.66625	-3.59546	-3.33101	-3.58009	-3.34662	-3.70797	-4.21241	-3.60005	-3.70395	-3.72601	-3.78489	-4.72121	-4.07546	-4.84031
Utrn	-2.56425	-2.7033	-4.13731	-3.20043	-4.28973	-3.24407	-3.10606	-3.18888	-2.60228	-3.8895	-3.7205	-3.25318	-2.93773	-2.86994	-3.11884	-2.75478	-3.02124	-3.29398	-3.86378	-3.50175	-3.74232	-4.05915	-3.68282	-3.58616	-3.97507	-2.84254	-3.18216	-4.41395	-3.45505	-3.20899	-2.81633	-3.34404	-2.88846	-3.87202	-3.35009	-3.82398	-3.43428	-3.34054	-2.87926	-4.29206	-3.01173	-3.51705	-2.94344	-3.58174	-3.28608	-3.70461	-3.16599	-2.31131	-4.26453
Ssfa2	-3.89726	-2.7415	-4.0843	-3.56828	-4.38292	-4.03753	-4.53171	-3.5518	-3.0742	-3.82936	-3.2367	-3.56182	-3.36403	-3.24382	-3.55211	-3.11595	-3.04956	-3.78411	-3.7461	-3.39377	-3.15712	-3.67454	-3.94255	-3.934	-3.60056	-3.76965	-4.08799	-3.92661	-3.65339	-3.53207	-2.89493	-3.53355	-3.06163	-3.42117	-2.40329	-3.7797	-3.15026	-3.28741	-3.09605	-3.72397	-2.99238	-4.04223	-3.56561	-3.37817	-3.64612	-3.21332	-2.81361	-2.75352	-3.32226
Csrnp1	-6.11515	-5.70923	-6.43301	-5.93826	-5.89265	-5.94669	-4.44338	-4.87043	-5.919	-5.27854	-6.11928	-6.01666	-5.56814	-5.82873	-6.51687	-5.16344	-5.30187	-6.09516	-6.06774	-6.36838	-5.85644	-6.11128	-6.25759	-5.84583	-5.67229	-5.57656	-6.3441	-5.82758	-5.9394	-6.02682	-6.43621	-5.70746	-5.60599	-5.53405	-4.09948	-4.86588	-4.63978	-4.17315	-4.21989	-4.51117	-6.30773	-5.903	-5.61474	-5.38844	-5.07842	-5.6026	-5.4867	-4.71118	-6.1504
Nnat	-1.24904	-0.691006	-0.0457224	-0.822403	-1.6326	1.25002	0.00466687	-0.267414	0.90498	-0.422478	-2.01113	-1.14903	-0.55619	-0.295884	-1.91808	-2.10955	-0.345102	-0.617267	-0.961308	-0.537091	-0.972178	0.0836055	-1.65808	0.767368	0.92505	1.06954	-0.174412	-0.345843	-0.708072	0.16506	-2.47597	0.620868	-0.63834	-1.66281	0.279982	0.249003	-0.121111	1.23159	0.581912	-0.301989	0.327017	-1.52652	-0.942369	-0.509916	0.664767	0.394581	-0.112564	-1.34556	-0.569859
Gria2	-0.52334	-0.292933	-0.840916	-0.988126	-1.0295	-0.252289	-0.37169	0.022151	0.0658082	-0.29114	-0.0874713	-0.088328	-0.526783	-0.652779	-0.798111	-0.283794	-0.362425	-0.703275	-0.214002	-0.430615	-0.319489	-0.351044	-1.02147	-0.224936	-0.162718	-0.130044	0.0105139	-0.197302	-0.076993	0.537396	-0.407842	-0.195409	-0.281081	-0.205882	-0.810251	0.209357	0.162609	0.227032	-0.405037	-0.60776	-0.0985798	-0.059245	-0.432537	-0.655431	-0.474488	-0.36097	-0.813127	-0.0884561	-0.183281
Gria4	-2.98048	-2.19226	-2.85688	-2.80842	-2.87002	-2.45105	-2.5293	-2.48754	-2.74326	-2.97783	-2.69413	-2.20412	-2.63821	-2.5182	-3.03036	-2.34436	-2.52903	-3.40021	-2.87585	-2.57227	-2.64327	-2.69606	-3.13086	-3.00196	-2.81648	-2.67303	-1.8297	-2.6326	-2.62514	-2.16439	-2.12843	-2.92055	-2.47211	-2.71959	-2.36542	-3.08059	-2.09112	-2.15572	-2.23848	-2.46285	-2.55975	-3.07161	-3.05048	-2.4474	-2.71072	-2.47245	-3.00551	-2.56041	-2.67813
Grm1	-4.44819	-3.90612	-3.68	-3.84835	-3.70342	-3.06139	-4.31832	-3.88832	-4.47422	-4.93986	-4.08755	-4.10617	-4.94456	-3.77757	-4.98	-4.20038	-3.92331	-4.42685	-4.18883	-3.76966	-3.82725	-3.90045	-4.29182	-4.686	-4.6248	-4.70715	-4.47536	-4.6311	-4.35967	-4.19678	-4.4949	-4.6061	-4.37658	-4.55809	-4.36687	-4.67117	-3.66534	-3.43339	-4.34052	-4.64074	-4.34503	-4.55033	-4.89593	-4.08783	-5.30256	-4.82557	-5.24006	-4.86909	-4.80718
Grm5	-3.73285	-3.9876	-4.2004	-4.94761	-4.41662	-4.1783	-4.62403	-3.89755	-3.78703	-3.80092	-3.07375	-3.26143	-3.06485	-3.32535	-3.55923	-2.64819	-4.16415	-4.8405	-4.58554	-4.04291	-3.99667	-4.05804	-4.91446	-4.14183	-3.78082	-4.29815	-4.36242	-4.29008	-2.93105	-2.17415	-3.33053	-3.58932	-3.04547	-3.01434	-4.59604	-3.80838	-4.42927	-3.67549	-4.81047	-4.80656	-3.77577	-4.51285	-4.88688	-4.24815	-4.63571	-4.70525	-4.31584	-3.4601	-3.18812
Grin1	-4.23103	-3.66615	-5.04022	-5.337	-4.90449	-5.09649	-5.20583	-4.12854	-3.78934	-4.54516	-5.32451	-4.23085	-5.28097	-4.42457	-4.31247	-4.07039	-4.36371	-5.11526	-4.58204	-4.39036	-4.42528	-4.71939	-5.04742	-4.47782	-4.13426	-4.16411	-4.12991	-4.34359	-5.5825	-2.7061	-3.94326	-4.22967	-5.63128	-4.47139	-4.88316	-4.19461	-3.91851	-4.25016	-4.8426	-4.8146	-4.81187	-4.18454	-5.01571	-4.36588	-4.96182	-4.94975	-6.37688	-4.70845	-4.72554
Grin2c	-3.51098	-3.51286	-4.41778	-4.77235	-4.55674	-2.91408	-2.44158	-2.42685	-2.77049	-2.49258	-4.54134	-4.51089	-4.83308	-4.62753	-5.13591	-4.36933	-3.28226	-2.80046	-4.01446	-4.12586	-2.68482	-3.70792	-1.78766	-2.07045	-2.16143	-2.816	-1.48773	-2.00855	-4.78258	-4.82541	-5.39194	-5.47114	-5.76815	-3.60671	-3.7612	-3.27745	-3.46557	-3.67893	-3.5749	-3.45145	-2.39014	-3.6025	-1.9541	-2.34404	-2.39931	-2.78704	-5.54408	-4.22923	-4.75617
Mapk3	-1.29867	-1.05352	-1.6626	-1.83647	-2.18223	-1.53766	-1.73657	-1.1896	-0.565255	-1.97831	-1.57178	-1.83977	-1.73064	-0.601022	-1.30775	-1.87658	-2.06244	-1.78875	-2.17874	-1.47949	-1.80472	-1.52171	-2.48337	-1.99111	-1.44522	-1.07356	-1.62964	-1.96004	-1.73298	-1.12854	-1.6095	-1.21972	-0.783911	-1.4286	-0.696247	-1.17949	-1.66185	-1.38985	-1.29978	-2.06603	-1.12806	-1.83042	-2.13775	-1.5682	-1.87975	-2.0063	-1.64325	-1.62649	-2.33156
Mapk1	-2.17749	-2.59636	-2.99767	-3.31256	-3.06456	-2.8777	-3.10171	-2.50753	-2.72782	-2.41802	-2.80624	-2.58574	-2.3598	-1.98054	-2.34517	-2.26823	-2.77608	-3.27556	-2.65075	-2.36457	-2.57939	-2.71897	-3.08126	-2.81667	-2.87037	-2.63332	-2.32587	-2.80287	-3.09632	-2.01607	-2.47892	-2.65386	-2.87301	-2.39632	-2.86354	-1.33217	-2.78621	-2.4883	-2.30712	-2.87756	-2.68237	-2.00987	-3.18506	-3.21942	-3.09121	-2.6528	-2.9722	-2.26349	-3.1308
Map2k1	0.0574802	-2.04118	-2.43604	-1.3275	-2.36664	-1.30465	-1.45544	-1.84311	-0.273202	-1.43161	-1.22193	-0.41168	-1.78862	-1.35329	-1.09325	-1.24107	-2.01407	-2.3434	-1.39627	-1.6214	-1.74341	-1.14196	-1.67021	-1.6061	-1.15718	-1.3034	-1.1185	-0.860623	-1.76352	-0.669947	-1.27639	-1.51919	-0.328499	-0.44686	-1.87459	-1.39863	-0.922259	-0.894566	-1.75912	-1.31321	-1.26881	-1.53994	-2.26271	-1.65462	-1.74809	-1.37009	-1.64309	-1.505	-1.86278
Map3k1	-4.73124	-4.85656	-4.34658	-5.20147	-6.3444	-5.49905	-5.06254	-4.59095	-4.46962	-4.68563	-4.64532	-4.92152	-3.91215	-4.19089	-4.46277	-4.89495	-4.55798	-4.77754	-4.87333	-4.54012	-5.18752	-5.24596	-4.44063	-4.99248	-4.69418	-4.03417	-4.45176	-4.32213	-5.63891	-4.40949	-5.03771	-4.34022	-4.66471	-5.21009	-4.30165	-4.44289	-4.7056	-4.7558	-4.26428	-5.13766	-4.28061	-5.80145	-5.09739	-4.9328	-4.80189	-5.21946	-4.49318	-4.82443	-5.06583
Creb1	-3.85299	-4.18429	-4.53456	-4.53077	-3.73106	-3.94196	-4.22073	-3.82261	-4.23143	-3.68314	-3.99602	-4.31636	-3.77676	-4.42135	-3.61697	-4.19281	-4.01592	-4.26511	-3.92826	-3.6077	-3.75501	-3.9945	-4.40121	-4.14342	-3.41706	-3.42381	-2.84835	-3.34687	-4.06343	-4.44022	-4.32542	-3.96388	-3.80716	-3.96801	-3.75352	-4.41542	-4.10316	-2.97369	-3.94345	-4.13108	-3.98836	-4.35717	-4.27197	-4.26248	-3.95281	-4.3519	-4.38856	-3.18117	-4.11696
Crebbp	-1.47739	-2.32439	-2.14144	-2.52612	-2.56074	-2.1335	-1.75508	-2.10291	-1.76509	-1.49951	-2.68864	-2.26754	-1.98823	-1.88653	-2.50358	-1.9621	-2.11497	-2.0768	-2.36812	-1.70995	-2.07079	-2.11739	-2.47137	-2.21618	-1.7114	-1.8651	-2.003	-2.16831	-2.51618	-2.07778	-2.46296	-1.87749	-2.19709	-2.35456	-1.71876	-2.10731	-1.52216	-1.73953	-1.99012	-2.3019	-2.16673	-2.24067	-2.3367	-2.15082	-2.37672	-1.875	-2.87837	-1.99101	-2.01441
Crem	-6.69082	-5.40278	-5.53024	-6.55175	-6.07117	-5.16329	-4.75353	-5.76246	-6.19416	-6.82648	-6.57246	-6.56416	-5.34294	-6.56965	-6.68427	-5.5457	-5.50966	-5.47607	-5.14432	-5.56382	-6.19294	-5.59371	-5.52852	-5.64657	-4.5433	-5.31245	-5.23108	-3.81261	-6.27673	-6.61202	-7.09256	-6.03798	-6.43421	-5.9283	-6.73279	-4.80888	-4.6782	-4.96868	-6.36187	-5.58118	-6.04039	-6.62983	-4.93875	-4.95416	-4.40257	-6.00685	-6.74348	-5.56683	-6.03605
Rasd1	-2.34882	-3.03152	-2.61326	-3.89092	-2.75725	-1.28036	-0.224049	-0.585351	-0.354501	-0.0456067	-3.95131	-3.53455	-5.22614	-2.59443	-5.06571	-5.08166	1.02876	1.23755	0.540082	0.468277	1.97738	0.58837	0.707392	1.17531	1.39955	1.03182	2.0069	2.06275	-4.74088	-4.7863	-4.42811	-4.21391	-3.48404	-5.25391	0.353037	1.14446	0.55189	0.894092	0.429663	0.854034	1.01584	-0.360559	1.06644	1.22867	1.19947	0.548018	-4.3295	-3.1391	-4.50407
Nras	-6.45287	-6.38261	-7.03642	-6.65017	-6.69673	-6.19137	-6.40261	-5.76098	-5.34634	-6.33603	-5.61884	-6.55432	-6.1258	-5.97754	-5.79457	-5.63559	-5.95574	-5.7723	-6.15878	-5.54202	-6.33565	-6.12824	-5.74459	-6.52894	-6.36642	-5.91921	-5.93867	-6.57816	-5.99737	-6.05338	-6.53947	-6.1245	-5.71453	-6.1041	-5.4796	-6.56347	-6.04346	-6.17962	-6.31301	-5.71058	-6.47415	-6.2363	-5.6889	-6.43556	-6.39974	-6.43084	-6.00763	-5.87328	-6.48986
Rasa1	-4.74757	-4.24362	-4.31035	-4.30058	-4.21282	-4.37564	-4.14183	-3.83743	-3.51689	-4.48489	-4.12466	-4.0896	-4.07593	-4.1965	-4.81639	-4.33006	-4.06439	-4.54167	-4.21978	-4.09498	-3.93628	-3.82275	-5.02046	-4.53699	-4.05308	-3.87066	-3.8292	-4.52866	-3.69121	-4.16057	-4.30053	-4.17939	-3.99734	-4.36499	-4.01725	-3.99758	-3.73288	-3.76751	-3.62074	-3.22961	-4.29588	-4.11715	-3.99492	-4.32868	-4.32521	-3.82455	-4.82511	-4.25286	-4.13813
Rasa2	-5.28995	-5.86279	-5.73779	-5.93579	-6.13807	-5.13578	-5.73154	-5.33865	-4.95987	-5.10915	-5.3318	-5.6148	-5.55015	-5.3876	-5.68894	-4.85481	-5.28651	-5.81321	-5.49521	-5.60863	-5.61482	-5.56669	-5.87198	-5.47583	-5.41812	-5.2779	-4.97498	-5.09835	-4.76558	-5.85091	-5.8353	-6.09006	-4.8537	-5.34486	-5.20932	-5.29614	-5.09346	-5.19454	-5.20656	-5.08226	-4.86154	-5.32975	-4.94766	-5.29925	-5.55777	-5.44623	-5.95152	-4.90721	-5.83171
Rasa3	-4.20419	-4.32589	-4.4041	-3.99319	-4.92043	-3.42018	-3.67381	-3.37352	-3.82853	-3.75763	-4.21408	-4.16173	-4.11386	-4.58127	-3.88752	-3.67641	-4.32626	-4.6661	-4.55939	-4.27977	-4.11496	-4.40984	-4.61789	-4.40927	-3.66714	-4.1186	-3.82956	-4.05188	-4.5386	-4.58997	-4.66374	-4.41717	-4.06296	-3.64132	-4.3938	-4.63886	-4.38158	-3.53836	-4.26953	-4.27899	-4.31778	-4.03782	-3.55641	-3.52851	-4.09863	-3.88244	-4.99565	-4.11132	-4.66657
Prkca	-3.579	-2.20325	-2.43483	-2.40853	-2.04444	-1.66998	-1.43902	-1.81884	-1.83943	-1.9387	-3.44983	-3.2942	-2.62279	-2.72085	-3.23119	-2.26306	-2.16399	-2.1905	-2.29466	-2.11968	-2.01802	-2.2758	-2.04656	-2.07778	-1.73878	-2.07755	-0.87829	-1.5586	-2.99194	-2.56866	-2.48648	-3.03777	-2.19747	-2.80684	-1.78126	-1.85979	-1.95446	-1.94262	-1.8595	-1.8436	-1.73178	-2.1277	-1.59193	-1.59653	-1.63202	-1.53592	-3.36979	-2.03536	-2.4774
Prkcb	-2.60453	-3.10038	-2.91104	-3.9275	-4.01914	-2.57015	-2.99367	-2.38691	-2.15886	-2.72738	-2.16089	-2.24398	-1.82241	-1.98472	-2.41324	-2.13032	-3.17399	-3.3921	-3.5093	-3.03898	-3.46784	-3.59232	-2.80762	-2.50068	-2.4519	-2.315	-2.39401	-2.67295	-2.45043	-0.694823	-2.21728	-2.40365	-1.67578	-2.19842	-2.48007	-2.55258	-2.84771	-3.04106	-3.01434	-3.42084	-2.13652	-2.75695	-3.32427	-2.63976	-3.15341	-2.99652	-2.76413	-2.50026	-2.44142
Prkcc	-2.34143	-4.01912	-4.46703	-5.90133	-4.59525	-4.03695	-4.71005	-3.29145	-2.45285	-3.57233	-3.44636	-2.50681	-3.35623	-2.20866	-3.59642	-3.45098	-2.9291	-4.92931	-4.37406	-3.80516	-5.46196	-4.84986	-2.84369	-3.7838	-3.56572	-0.935146	-4.16261	-4.94318	-3.87143	-1.63015	-3.4641	-3.17274	-3.97213	-3.53703	-3.69334	-3.74751	-3.64749	-4.41498	-2.8351	-3.76882	-3.5241	-3.48972	-4.0198	-2.81799	-3.57169	-4.03379	-4.18852	-3.07064	-3.65083
Ppp1ca	-3.18091	-1.48675	-2.29796	-2.19175	-2.04044	-1.87211	-2.27999	-1.69369	-1.38927	-2.00606	-2.04871	-1.96848	-2.15586	-1.56442	-1.85066	-1.32375	-1.94294	-2.22591	-1.64734	-1.10772	-1.60551	-2.24526	-1.97379	-1.83511	-1.29935	-1.04843	-0.885724	-0.988578	-1.56161	-0.565342	-1.62298	-1.81059	-1.27707	-2.01147	-1.58825	-1.79986	-1.67601	-0.994367	-1.16004	-1.25257	-1.27992	-1.34463	-1.85028	-1.71221	-1.67374	-1.92521	-2.0571	-1.74657	-1.83157
Ppp2ca	-0.700143	0.226733	-0.0192707	0.196259	0.0586271	0.828199	-0.173814	0.412748	0.505409	-0.411013	0.898202	0.75836	0.512669	1.74896	0.355839	0.933465	-0.0608423	-0.0838817	0.549969	0.758652	0.610254	0.325842	-0.1024	0.168106	0.504876	0.567625	0.764654	1.04666	0.95909	1.53804	0.911351	1.32101	0.88849	0.693986	1.05483	0.36476	0.39907	0.916987	0.661281	1.27429	0.523488	0.40286	0.145837	0.368002	0.643227	0.0302305	0.633737	1.19751	0.32058
Prkaca	-0.486145	-0.525738	-0.79387	-0.929163	-0.815347	-0.25454	-0.61017	-0.227167	-0.267146	-0.0489686	-0.338586	-0.585233	-0.645673	0.248231	-1.22422	-0.407218	-0.506359	-1.09402	-0.917768	-0.365491	0.0495753	-0.783452	-0.972342	-1.03425	-0.555189	0.23297	-0.101397	-0.293673	-0.0785166	-0.66061	0.24448	-0.12173	0.287413	-0.295013	-0.374488	-0.880881	-0.60615	-0.145658	-0.590187	-0.327255	-0.651393	-0.650258	-0.9918	-0.689138	-0.585872	-0.402233	-1.32591	0.211666	-0.678798
Prkacb	-1.00168	-0.506088	0.00871422	-1.20318	0.277494	-0.58341	-0.755787	-0.315669	1.91272	1.76351	0.462251	1.54466	-0.204472	0.272258	-0.457251	-0.440133	0.13657	0.301909	-0.235896	-0.520724	-0.625862	-0.847079	-0.806663	0.236737	-0.486987	-0.541177	-0.249431	-0.62411	1.28014	-0.15614	-0.380149	0.522009	0.909863	1.3116	-1.12085	1.20421	-0.745954	0.952296	-1.0765	-1.31778	-0.457949	-0.360627	-0.789182	-0.741598	-0.958281	-0.944127	-0.757934	-0.860082	0.552817
Prkg1	-10.0593	-5.53224	-7.47329	-6.28696	-7.7154	-6.51382	-5.41512	-5.90554	-6.8802	-6.89397	-5.76326	-5.54433	-6.02502	-6.6733	-5.29602	-7.33748	-6.19691	-6.79256	-6.66496	-6.14469	-7.12872	-7.91407	-7.08253	-6.05836	-6.28973	-5.28354	-5.02361	-5.64538	-6.98974	-6.18407	-5.80411	-5.46193	-6.07546	-7.19292	-6.97039	-6.25954	-7.47985	-6.45392	-5.54312	-6.51685	-6.14243	-6.6889	-5.54176	-5.0157	-6.8445	-5.83936	-6.68768	-5.42752	-6.78292
Prkg2	-3.89257	-4.32005	-4.5783	-4.32222	-4.10097	-3.7499	-4.60638	-4.10295	-4.59111	-4.12835	-4.65133	-5.18796	-5.01837	-5.52996	-5.86578	-5.28163	-4.01932	-4.01418	-3.93191	-3.50221	-3.5016	-3.43247	-4.41639	-3.53173	-3.56085	-3.56586	-2.97953	-3.09109	-4.92136	-6.19905	-4.87369	-5.72664	-5.30175	-5.70247	-4.56474	-4.59711	-3.6993	-3.21826	-4.28914	-4.08804	-3.36598	-5.48952	-3.85441	-2.84929	-3.25826	-4.2443	-5.64035	-5.98538	-4.99184
Gabra1	-3.49357	-2.99426	-2.57562	-2.83798	-3.51357	-2.18209	-2.74173	-1.45212	-2.01882	-3.38284	-1.56544	-0.732906	-1.10409	-0.871312	-1.07646	-0.897483	-2.46124	-3.67804	-2.69614	-2.25871	-2.89717	-2.97965	-1.7296	-2.88617	-1.33777	-1.97324	-1.53243	-2.11531	-0.944632	-1.68922	-0.686114	-1.50013	0.0605016	-1.15533	-2.71506	-2.77427	-2.57906	-3.04762	-2.68561	-3.76299	-1.73875	-1.40093	-3.39683	-2.1403	-2.85261	-2.71034	-1.19635	-1.00094	-1.0073
Gabbr2	-2.90466	-4.13253	-3.9982	-4.14548	-4.38282	-3.61461	-4.02749	-3.55372	-3.81506	-3.6167	-3.62449	-3.506	-4.26756	-3.09256	-4.44051	-3.33618	-4.06081	-4.9076	-4.53604	-4.25951	-4.53918	-4.35669	-3.89135	-4.91365	-4.15865	-3.82281	-4.14718	-3.79449	-3.98026	-3.69735	-4.22805	-4.41653	-4.09649	-3.83766	-4.83177	-4.32432	-4.13724	-4.04155	-4.30714	-4.51158	-4.32641	-4.18019	-4.93753	-3.84687	-5.09895	-4.3224	-4.75518	-4.14424	-4.44685
Slc12a4	-7.16217	-5.65953	-6.66521	-6.44993	-7.82543	-6.8653	-6.70956	-6.44431	-6.93462	-6.76072	-6.45863	-5.96373	-6.6818	-6.85284	-6.60373	-5.99424	-5.54269	-7.37682	-7.3199	-6.62736	-7.45267	-7.73435	-7.3526	-6.76372	-5.3641	-5.50095	-7.69994	-5.55333	-6.78024	-7.12225	-7.46471	-6.11396	-5.30391	-7.08373	-6.08696	-6.83564	-6.10469	-7.24218	-6.07102	-6.3292	-6.70068	-6.81401	-5.57208	-7.01159	-6.82505	-6.0332	-6.43995	-6.18674	-7.07288
Slc12a5	-0.654665	-0.284197	-0.175711	-1.064	-0.166396	-0.496805	-1.40532	0.0688926	-0.625619	-0.463432	0.635322	1.34664	1.30134	0.447948	-0.620172	0.128692	-0.378654	-0.121066	0.464924	0.367311	0.391617	0.253019	-0.453839	-0.624806	0.0764694	0.144486	0.000951624	-0.671465	0.71416	0.819858	0.298566	-0.190203	0.252243	0.63856	-0.302467	-0.281046	-0.265465	0.125397	0.0560944	-0.636551	-0.433023	-0.0568777	-1.17394	-0.922651	-1.30398	-0.730679	-0.186183	0.164386	-0.22802
Slc12a6	-2.78654	-3.19801	-3.70166	-3.91299	-3.84835	-3.4112	-3.35337	-2.77974	-2.78914	-3.37881	-3.26949	-2.78473	-3.4347	-3.29034	-3.88217	-3.10069	-3.46695	-3.27386	-3.09959	-2.78782	-3.34107	-2.68423	-3.76911	-3.59788	-3.40766	-2.75077	-2.46832	-3.25341	-3.35484	-3.01679	-3.78574	-3.43539	-3.13166	-3.34019	-3.12689	-3.66808	-3.47768	-2.74532	-3.23696	-3.65707	-3.12164	-3.70344	-3.46799	-3.41184	-3.41957	-3.08334	-3.36336	-3.25183	-3.85527
Slc12a7	-5.16412	-4.63692	-3.99403	-4.32172	-4.72163	-3.73906	-3.4426	-3.53058	-3.63167	-5.05635	-6.00851	-6.02309	-4.09492	-3.79178	-5.1735	-5.0948	-3.48237	-4.10215	-3.85242	-3.34475	-3.35935	-4.06537	-4.07928	-3.13207	-2.64256	-3.49552	-3.17005	-3.55176	-4.92301	-4.96456	-5.26031	-4.40027	-3.31672	-7.44168	-2.87175	-3.38855	-3.35478	-3.01994	-2.98827	-3.52235	-3.26138	-3.73286	-3.18579	-2.8801	-3.07118	-3.17313	-3.48389	-4.15584	-5.49233
Calb1	-1.77388	-1.5678	-2.74453	-2.339	-2.35579	-1.35243	-1.91656	-1.57616	-1.9468	-1.06267	-1.63362	-1.27476	-1.33308	-2.05527	-1.77874	-1.57698	-2.40973	-3.07085	-1.8876	-1.70906	-1.85114	-2.43082	-2.315	-1.78996	-1.27152	-0.563848	-1.3419	-1.40793	-1.77211	-1.43754	-2.21152	0.113042	-1.23054	-1.62343	-2.79052	-2.48557	-1.72363	-1.76135	-1.89788	-2.09233	-2.00189	-1.95046	-2.33305	-1.3288	-1.90985	-1.48284	-2.83476	-1.76051	-1.40217
Camk2a	-3.70384	-1.52382	-1.78659	-2.3654	-2.03431	-1.40485	-2.45137	-1.48649	-0.900162	-2.1808	-1.81545	-1.44691	-2.51049	-1.14876	-2.37842	-1.96896	-1.44391	-2.20567	-1.89409	-2.07844	-1.86736	-1.72179	-1.7271	-1.46065	-1.64504	-1.31395	-0.465073	-2.35397	-2.26771	-0.277737	-1.89525	-1.24197	-3.05854	-1.65154	-2.0984	-0.522813	-0.29665	-1.33492	-1.73431	-2.37632	-1.75636	-0.450515	-2.36454	-1.0189	-2.1646	-1.88583	-2.87524	-1.68493	-2.26997
Camk2b	-2.38867	-2.27773	-3.13347	-3.42528	-3.26931	-2.84688	-2.86174	-2.42544	-2.15804	-2.88278	-2.89772	-2.45676	-3.52897	-2.11422	-3.4126	-3.51239	-2.71173	-3.27296	-3.48566	-3.1205	-3.38908	-3.06642	-2.42997	-2.87534	-2.61427	-1.85922	-2.91562	-3.1898	-3.02806	-0.744366	-2.68246	-2.53921	-3.12097	-2.99313	-2.93934	-1.45514	-2.63605	-2.89526	-2.85973	-3.50575	-1.91437	-1.12834	-3.21234	-2.88492	-3.18619	-3.20283	-3.8734	-2.66554	-2.85135
Brs3		-9.87971		-12.7915	-12.9869	-10.5768		-7.59758	-10.2082	-8.57021	-9.26816	-5.67401	-7.96528	-9.22366	-8.7409		-8.745	-11.1273	-9.88749						-9.45335	-6.2501			-9.18449	-9.37258	-9.51109	-8.93388		-8.19906	-9.27981	-9.47407		-10.8422			-10.4199	-9.02888				-8.03116	-7.62914	-7.88482	-9.30261
Grpr	-3.43938	-3.75307	-4.33625	-4.00772	-3.45957	-2.64697	-3.56018	-3.50476	-4.07191	-3.63769	-7.5696	-6.32185	-6.58607	-8.08526	-7.64737	-7.23665	-3.56408	-4.7957	-3.95891	-3.35705	-3.54286	-3.81705	-4.65708	-3.52671	-4.48301	-3.25644	-2.22806	-3.33012	-6.98938	-7.36634	-6.6228	-6.08881	-7.10135	-8.52085	-4.00405	-4.51472	-3.7814	-2.95461	-3.94239	-3.70502	-2.55503	-4.82944	-2.53808	-2.86002	-2.22407	-3.73589	-7.82619	-7.28301	-6.11669
Nmbr	-7.26125	-9.22875	-8.57837	-7.55354	-8.34919	-7.64454	-7.06661	-6.68001	-7.34674	-5.79593	-10.303	-7.25635	-8.4516	-7.70712	-9.02317	-6.21203	-8.24914	-7.90773	-7.29282	-6.2774	-7.05157	-7.06721	-8.54825	-6.27055	-5.54753	-5.03941	-6.09725	-5.47078	-8.27938	-7.29377	-8.55415	-6.55111	-8.18301		-7.28041	-8.12635	-6.9479	-6.34047	-8.15186	-8.62685	-6.14479	-5.98727	-6.88558	-7.21238	-6.72951	-6.1083	-8.17104	-6.24775	-7.44254
Vipr2	-3.53943	-2.99576	-3.05445	-3.23745	-3.09086	-3.05064	-2.6575	-3.10091	-3.47526	-2.88677	-9.77287	-8.61198	-8.06626	-7.55825	-8.51487	-12.0862	-1.9226	-2.03291	-2.8092	-2.51125	-1.64697	-2.26258	-2.57715	-2.2724	-1.44566	-1.55684	-1.20746	-1.43011	-12.5795	-8.15716	-10.5606	-7.69515	-7.82371	-9.24976	-2.75155	-2.78719	-2.09816	-2.00017	-2.44622	-2.04795	-2.05816	-3.60606	-1.62343	-2.19765	-1.50111	-1.92895	-8.09126		-6.97099
Avpr1a	-4.85421	-4.60852	-4.98761	-4.85745	-4.88242	-3.31955	-4.01048	-3.94094	-4.39398	-2.88589	-8.18614	-7.13994	-6.98971	-6.48972	-9.01958	-7.40491	-3.63892	-3.91519	-3.6961	-3.61594	-3.03682	-3.18499	-4.32392	-3.29137	-3.2288	-0.179512	-1.94509	-2.68733	-11.9673	-6.91842	-7.07664	-8.3702	-7.17995	-8.42739	-3.90064	-4.90799	-4.31263	-3.33455	-4.88785	-4.0737	-3.17741	-5.07321	-2.99739	-2.46305	-3.54096	-3.8274	-6.96264	-5.35716	-6.55196
Avpr2	-11.6241	-9.30811	-9.60615	-8.58475	-8.59596	-8.49218		-7.7286	-8.83012	-11.3717	-8.99109	-9.09171		-10.1642	-11.0864	-10.0144	-9.56619	-9.3918	-7.83686	-9.96268		-8.29309	-11.117	-10.1657	-8.48753	-9.80664	-8.37908	-8.61515	-10.2124	-10.5642	-9.71118		-10.3948	-10.6171		-10.4328	-10.8984	-8.10453	-9.90442	-10.6215	-9.05652	-9.89538	-12.5369	-9.03517	-9.58993	-9.27109	-7.74011	-9.17171
Cul5	-3.57097	-3.64282	-3.11195	-2.52271	-3.57859	-3.39957	-4.41887	-4.32886		-3.89636	-3.7268	-4.21856		-4.36693	-3.92956	-3.37941	-3.43155	-3.54929	-4.3428	-4.2506	-3.81948	-2.95617	-4.29602	-4.52952	-3.96259	-4.61227	-3.43458	-3.4507	-4.6059	-3.15334	-4.61707	-4.48632	-3.33874	-3.15885	-4.13371	-4.61545	-3.05134	-4.33952	-3.07631	-4.23244	-4.00739	-4.60006	-3.75958	-4.62884	-3.02283	-3.57905	-4.86593	-4.47558	-4.13777
[truncated: 3 more columns]

## Sheet: Average_SEM
	ZT 6						ZT 15						ZT 15 + LP
	Core	SEM	Shell	SEM	Outside	SEM	Core	SEM	Shell	SEM	Outside	SEM	Core	SEM	Shell	SEM	Outside	SEM
Clk	-4.89748	0.271127	-4.9563	0.195386	-5.2504	0.290457	-4.26209	0.242164	-4.2696	0.260198	-5.01338	0.12815	-4.14053	0.175302	-4.50989	0.139403	-5.76218	0.254021
Npas2	-6.75509	0.507705	-6.07996	0.347559	-6.68548	0.236679	-7.07415	0.215548	-5.16869	0.129915	-6.88757	0.46941	-6.88934	0.285093	-6.02391	0.224675	-6.98683	0.259815
Bmal1 (arntl)	-5.02194	0.243001	-4.26838	0.278116	-5.02673	0.218323	-3.16835	0.139042	-4.43942	0.253001	-5.00885	0.051885	-3.20064	0.235557	-3.1665	0.190428	-5.07797	0.221225
Per1	-5.33566	0.231582	-5.15012	0.169299	-5.97823	0.121514	-5.7184	0.219995	-4.87421	0.181278	-5.81456	0.375428	-4.51922	0.116277	-5.39413	0.139263	-5.37024	0.227643
Per2	-4.06105	0.15719	-3.51082	0.0723678	-6.15977	0.182012	-3.37394	0.154835	-3.98036	0.131394	-5.3947	0.305042	-2.67397	0.0971418	-3.13312	0.07952	-4.78906	0.342654
Per3	-6.00911	0.180938	-6.21406	0.181926	-7.27535	0.170469	-6.2061	0.158683	-5.16539	0.228433	-6.72681	0.289207	-5.74997	0.328718	-6.58481	0.226501	-6.61141	0.146734
Cry1	-3.77413	0.250167	-3.38888	0.102603	-5.12614	0.140144	-2.99773	0.169607	-4.36261	0.226885	-4.41736	0.181504	-2.88387	0.193943	-3.17235	0.155164	-4.45251	0.200457
Cry2	-2.5233	0.3067	-2.47582	0.0564881	-2.88577	0.174359	-2.57426	0.261415	-3.97502	0.225747	-2.75225	0.201167	-2.37069	0.189415	-2.54152	0.152805	-2.89474	0.122119
Nr1d1	-1.63542	0.0926943	-1.4425	0.0442094	-3.10378	0.14477	-3.6811	0.11061	-2.93729	0.137574	-3.75032	0.232422	-3.50843	0.163651	-3.58031	0.145463	-4.22395	0.19378
Nr1d2	-3.48846	0.227161	-3.17172	0.160327	-3.64788	0.0808901	-3.97527	0.119551	-3.19765	0.0623312	-3.66794	0.120356	-3.66654	0.0606718	-4.14644	0.17624	-3.92907	0.143629
Rora	-1.77197	0.15393	-0.941661	0.168399	-3.74451	0.247362	-1.95028	0.110145	-3.03807	0.177783	-4.1929	0.102617	-1.42226	0.0983682	-1.37797	0.221282	-3.96901	0.189389
Rorb	-3.94034	0.183829	-2.48139	0.204027	-5.89298	0.189434	-4.14954	0.0829209	-3.07607	0.119974	-5.90432	0.16412	-4.03234	0.206734	-3.67003	0.231675	-6.07216	0.303451
Csnk1e	-4.3641	0.0744204	-4.20112	0.131946	-4.27096	0.142779	-4.14398	0.126485	-3.18496	0.078331	-4.01698	0.0592978	-3.85271	0.151043	-4.35178	0.116768	-4.23888	0.129329
Csnk1d	-2.2934	0.0566965	-2.13203	0.152677	-2.32915	0.106324	-2.00516	0.0890875	-3.17555	0.238212	-1.92826	0.18322	-1.82627	0.123952	-2.08853	0.0704557	-2.21254	0.131161
Vip	-1.12144	0.226956	-5.99695	0.603123	-8.74903	0.810564	-0.879333	0.380232	-3.77326	0.486722	-10.25	0.457205	-1.56686	0.368462	-5.98239	0.818755	-11.128	0.901189
Avp	-1.5655	0.0921919	1.25077	0.253579	-4.92839	0.969775	-1.01066	0.377431	-2.62779	0.333149	-0.888075	0.806879	-1.2521	0.513138	0.0303627	0.325958	-4.07916	1.07177
Grp	-1.03717	0.199092	-2.75919	0.424655	-5.98888	0.217947	-0.988303	0.251759	-3.11507	0.324988	-5.73179	0.460677	-1.02546	0.285497	-3.07818	0.20925	-6.03297	0.524031
Gsk3b	-2.43127	0.105768	-2.27525	0.0791956	-2.22312	0.172451	-2.25852	0.132494	-2.12428	0.0465543	-2.29424	0.0796736	-2.29687	0.0995118	-2.52295	0.131446	-2.59257	0.101559
Bhlhe40	-3.33222	0.179852	-3.1603	0.087809	-3.08462	0.0476193	-3.7424	0.290996	-3.02635	0.167019	-3.19945	0.145662	-3.2438	0.202096	-3.50089	0.144963	-3.38709	0.0925224
Egr1	-4.5408	0.401338	-4.4152	0.368993	-3.98674	0.261364	-4.60585	0.207789	-3.36529	0.202061	-3.81858	0.554869	-1.15033	0.344536	-3.13363	0.0945101	-4.42207	0.366943
Nr4a1	-7.55915	0.508746	-7.07903	0.429248	-8.25807	0.414559	-7.59914	0.273507	-4.84606	0.222744	-7.98262	0.537955	-5.2558	0.23198	-7.19374	0.377181	-7.83067	0.29068
Egr2	-9.32324	0.499412	-9.35365	0.471784	-9.12636	0.388268	-9.33152	0.615646	-6.63945	0.437082	-9.22209	0.881397	-5.8422	0.177102	-8.5574	0.404286	-9.97324	0.895307
Dusp1	-3.61985	0.157609	-2.80294	0.129016	-4.47113	0.126121	-4.4973	0.273011	-6.70281	0.0843965	-4.3289	0.220559	-2.81294	0.247333	-3.56113	0.132272	-4.13163	0.220013
Rrad	-5.7367	0.391772	-5.86617	0.232047	-6.01307	0.262382	-5.45604	0.251961	-6.30796	0.212625	-6.19961	0.199178	-2.41868	0.250492	-4.72485	0.275945	-6.60679	0.367589
Pim3	-4.99379	0.201303	-4.47129	0.0750554	-4.28897	0.111909	-4.76236	0.115565	-4.91079	0.139573	-4.18697	0.136387	-4.11304	0.142776	-4.69147	0.0473119	-4.14039	0.109965
Klf4	-7.38125	0.215918	-7.67125	0.323771	-6.85985	0.213486	-7.82422	0.228049	-6.14011	0.432508	-6.95808	0.270928	-6.59828	0.320752	-7.39771	0.174854	-6.88049	0.527276
Fos	-5.55301	0.288379	-4.80568	0.132401	-6.96986	0.273944	-6.56084	0.219361	-6.056	0.279735	-7.62428	0.362407	-3.92623	0.292175	-5.12434	0.38537	-6.80486	0.293156
Gadd45b	-6.51936	0.362459	-6.72493	0.245838	-6.26087	0.235789	-5.62455	0.16412	-6.57441	0.2984	-5.69216	0.564422	-4.79891	0.239814	-5.85859	0.202811	-5.89161	0.434608
Btg2	-3.38642	0.241464	-2.55769	0.0579017	-3.95835	0.153127	-3.96357	0.110282	-5.07574	0.140878	-4.17024	0.242532	-2.21148	0.13677	-2.58671	0.126975	-3.76849	0.23473
Tiparp	-6.59648	0.441107	-5.73994	0.184429	-5.39075	0.112203	-5.81873	0.314483	-5.14374	0.142196	-5.07625	0.277804	-4.96483	0.22071	-5.46827	0.175138	-5.09079	0.118851
Jun	-4.67495	0.262329	-4.15926	0.201822	-4.39216	0.218789	-4.31075	0.178128	-4.51212	0.0879131	-4.43715	0.150177	-3.6638	0.167527	-4.17472	0.100057	-4.5532	0.110229
Junb	-4.55347	0.289713	-4.09246	0.162796	-5.17569	0.251049	-5.26227	0.136999	-5.00555	0.167388	-5.36947	0.396246	-2.65606	0.217837	-4.13018	0.106375	-5.29092	0.181424
Cebpb	-5.4416	0.237618	-4.88497	0.219807	-5.45177	0.198514	-5.46172	0.291141	-5.06129	0.142939	-5.16333	0.301932	-3.93838	0.217771	-4.87954	0.160006	-4.83186	0.247136
Nr4a2	-5.58982	0.218906	-6.81549	0.488107	-5.60049	0.668103	-6.26877	0.382827	-5.7085	0.481197	-6.23867	0.295302	-4.33162	0.249247	-5.96472	0.369845	-6.4768	0.622875
Kdm6b	-3.27321	0.260056	-3.28943	0.126712	-3.73544	0.204829	-3.29809	0.11601	-5.19755	0.109562	-3.67995	0.239585	-2.51546	0.0548888	-3.34821	0.0792845	-3.7028	0.228669
Ccnl1	-5.5477	0.239717	-5.06009	0.101145	-5.69621	0.068721	-5.30788	0.113264	-4.99632	0.14884	-5.31567	0.128184	-4.51484	0.149406	-4.97778	0.0756753	-5.24543	0.111156
Dusp4	-5.40647	0.325251	-5.53293	0.161281	-8.90734	0.35597	-8.14971	0.225186	-5.48389	0.0623383	-9.55176	0.423442	-5.6571	0.285216	-7.41255	0.0652614	-9.00328	0.245776
Plk2	-2.4322	0.176225	-2.23866	0.153216	-3.86918	0.0741869	-3.65191	0.176427	-5.4317	0.21129	-3.37006	0.346632	-2.78028	0.156758	-3.21606	0.112825	-4.20883	0.189122
Stk40	-4.5077	0.19841	-4.26322	0.101376	-4.29038	0.131776	-4.5161	0.125972	-5.27933	0.122369	-4.52706	0.154442	-4.00046	0.114557	-4.36315	0.0860316	-4.45845	0.0878182
Gria1	-1.36969	0.437635	-1.22219	0.145245	-0.688438	0.156006	-1.24105	0.0792306	-2.99297	0.203896	-0.60962	0.136301	-0.991458	0.380893	-0.94032	0.2055	-1.19929	0.192528
Arih1	-3.05989	0.198212	-3.0268	0.0874854	-2.80724	0.194652	-2.99926	0.130823	-2.871	0.123767	-2.84293	0.086242	-2.61482	0.155004	-2.95231	0.163169	-2.92745	0.113347
Slc39a6	-3.55143	0.222782	-2.98302	0.142648	-4.37509	0.113794	-3.41561	0.114685	-2.48436	0.255225	-4.26804	0.135643	-3.61843	0.127642	-3.78921	0.0880834	-4.47988	0.118409
Utrn	-3.37901	0.357542	-3.20616	0.205351	-3.10916	0.142218	-3.58037	0.156696	-3.39487	0.227848	-3.26415	0.158856	-3.52003	0.197269	-3.34078	0.127886	-3.58836	0.309252
Ssfa2	-3.73485	0.281334	-3.80492	0.242998	-3.34574	0.0740929	-3.46753	0.128733	-3.68997	0.0689116	-3.34946	0.123044	-3.24011	0.204663	-3.47297	0.149442	-3.2886	0.203382
Csrnp1	-6.01766	0.122287	-5.29161	0.293241	-5.86885	0.190974	-5.96681	0.148674	-4.47044	0.127433	-5.87499	0.136484	-4.41822	0.123709	-5.64916	0.172745	-5.57232	0.195791
Nnat	-0.888154	0.268078	0.293955	0.331626	-1.33998	0.322377	-0.558224	0.162802	-3.23343	0.425479	-0.78321	0.466776	0.319898	0.222687	-0.265407	0.354036	-0.925485	0.330337
Gria2	-0.734963	0.141818	-0.165432	0.0879057	-0.406211	0.122004	-0.396808	0.0677588	-2.03702	0.150548	-0.104969	0.135957	-0.204008	0.188152	-0.346875	0.0937034	-0.340464	0.145043
Gria4	-2.74161	0.140193	-2.6378	0.0989873	-2.57156	0.118242	-2.78612	0.13235	-0.957055	0.18716	-2.50503	0.128072	-2.39903	0.14714	-2.71874	0.114629	-2.63657	0.0807926
Grm1	-3.91722	0.139424	-4.13642	0.317014	-4.34937	0.202386	-4.00606	0.102685	-2.5126	0.0646372	-4.43202	0.0615887	-4.18634	0.211052	-4.66788	0.176465	-4.84471	0.195796
Grm5	-4.25702	0.20651	-4.05757	0.158133	-3.15547	0.125874	-4.2813	0.142207	-3.84937	0.150123	-3.01414	0.195312	-4.35437	0.202937	-4.46077	0.162182	-3.53806	0.189807
Grin1	-4.63578	0.302613	-4.55307	0.272485	-4.6073	0.224983	-4.59934	0.116958	-4.41673	0.144434	-4.42737	0.448029	-4.48394	0.168861	-4.71493	0.143657	-5.19644	0.294956
Grin2c	-4.15414	0.268205	-2.60912	0.0984669	-4.66968	0.112211	-3.43596	0.250086	-3.5787	0.181302	-4.97432	0.315209	-3.53492	0.0710885	-2.57952	0.231265	-4.79178	0.260647
Mapk3	-1.6067	0.198498	-1.40148	0.245736	-1.48792	0.196626	-1.80597	0.114371	-2.73399	0.200324	-1.31721	0.141447	-1.38221	0.188353	-1.75841	0.148187	-1.79751	0.153437
Mapk1	-2.82973	0.199544	-2.72655	0.123846	-2.39095	0.115032	-2.72755	0.124144	-2.1914	0.104052	-2.58575	0.154884	-2.44248	0.24069	-2.80679	0.188726	-2.81823	0.120527
Map2k1	-1.62278	0.463695	-1.2616	0.263004	-1.18497	0.182905	-1.71009	0.175472	-1.93496	0.12596	-1.00073	0.24459	-1.3604	0.166935	-1.64071	0.143795	-1.55989	0.069469
Map3k1	-5.09605	0.340707	-4.86156	0.187695	-4.5046	0.163009	-4.86374	0.123379	-2.84343	0.133421	-4.88352	0.205653	-4.60131	0.135512	-5.02227	0.204799	-4.87868	0.155553
Creb1	-4.16673	0.166789	-3.97997	0.108515	-4.05338	0.128357	-3.92775	0.0927922	-3.124	0.233148	-4.09469	0.0982235	-3.88672	0.203361	-4.19745	0.0736465	-4.14445	0.198299
Crebbp	-2.20602	0.197152	-1.85122	0.119036	-2.2161	0.133372	-2.07634	0.0861364	-3.38619	0.110629	-2.24768	0.0997207	-1.89663	0.117461	-2.19111	0.0730865	-2.34542	0.133028
Crem	-6.04935	0.259989	-5.73998	0.366941	-6.2132	0.245228	-5.58009	0.139249	-3.56059	0.286703	-6.39697	0.172672	-5.52193	0.351265	-5.49543	0.348453	-5.93282	0.260083
Rasd1	-2.92836	0.264726	-0.497973	0.214478	-4.2423	0.434034	0.973404	0.236077	-1.8959	0.221605	-4.48453	0.24672	0.704529	0.125727	0.782979	0.249637	-3.90263	0.282951
Nras	-6.64376	0.114381	-6.00746	0.199469	-5.95111	0.144861	-5.98212	0.117749	-3.26482	0.145014	-6.08889	0.108674	-6.04829	0.162298	-6.27758	0.12251	-6.20519	0.158788
Rasa1	-4.36299	0.0978177	-4.07133	0.177584	-4.27219	0.115304	-4.11331	0.102196	-3.02952	0.190981	-4.11567	0.0994277	-3.7276	0.118015	-4.14773	0.0846412	-4.33049	0.115502
Rasa2	-5.79288	0.141499	-5.255	0.133542	-5.40468	0.123028	-5.56418	0.0703374	-5.27957	0.129363	-5.45673	0.22757	-5.18038	0.0328155	-5.24037	0.113103	-5.73716	0.168068
Rasa3	-4.36956	0.154202	-3.61073	0.0909875	-4.10581	0.125567	-4.39272	0.0810624	-4.5917	0.144399	-4.31896	0.160722	-4.25019	0.15241	-3.9036	0.127707	-4.60221	0.116022
Prkca	-2.53401	0.270801	-1.74119	0.0869106	-2.93032	0.189429	-2.17711	0.0418398	-3.73273	0.191209	-2.68153	0.132169	-1.87354	0.0265321	-1.70265	0.0890365	-2.87567	0.218977
Prkcb	-3.31252	0.281509	-2.5674	0.142617	-2.12593	0.0836238	-3.36242	0.0868983	-2.78967	0.0750433	-1.94006	0.273218	-2.89277	0.141858	-2.83457	0.173103	-2.343	0.125592
Prkcc	-4.26483	0.573936	-3.61273	0.376447	-3.09424	0.238147	-4.39157	0.370942	-2.54188	0.563268	-3.2746	0.349386	-3.68454	0.205557	-3.57618	0.181775	-3.49926	0.294881
Ppp1ca	-2.23956	0.273698	-1.84822	0.149402	-1.81864	0.129056	-1.79578	0.177047	-2.41151	0.188267	-1.47484	0.207884	-1.41185	0.13096	-1.631	0.107755	-1.86287	0.123554
Ppp2ca	-0.047559	0.169208	0.232306	0.228148	0.867916	0.198485	0.349999	0.145183	-1.40642	0.167937	1.05199	0.128053	0.778537	0.14947	0.352274	0.0936487	0.708307	0.170313
Prkaca	-0.710053	0.0866683	-0.281598	0.0910988	-0.492117	0.195544	-0.602919	0.16974	-0.433629	0.203106	-0.103996	0.14398	-0.487436	0.105622	-0.661782	0.0781086	-0.639908	0.200282
Prkacb	-0.484948	0.283578	0.404273	0.590022	0.196218	0.310234	-0.298514	0.183592	-0.124777	0.149482	0.581221	0.294471	-0.350763	0.459236	-0.708627	0.101539	-0.515152	0.231978
Prkg1	-7.41343	0.771463	-6.32173	0.289085	-6.10657	0.312726	-6.80699	0.26835	-2.25437	0.304861	-6.2847	0.275909	-6.53728	0.267637	-6.01211	0.283538	-6.03232	0.233588
Prkg2	-4.24282	0.115674	-4.23574	0.162616	-5.25584	0.170711	-3.73361	0.115142	-3.27779	0.206832	-5.45416	0.210935	-4.0761	0.218603	-3.84363	0.384236	-5.38993	0.233277
Gabra1	-3.083	0.184296	-2.35552	0.328947	-1.04128	0.118966	-2.82849	0.202183	-3.78351	0.223563	-0.985821	0.256536	-2.92743	0.178978	-2.37329	0.305145	-0.779285	0.180505
Gabbr2	-3.91274	0.259517	-3.72552	0.0874246	-3.71122	0.217133	-4.44331	0.118455	-3.19156	0.171139	-4.04272	0.106802	-4.35893	0.115562	-4.45206	0.193814	-4.03703	0.261423
Slc12a4	-6.75245	0.361439	-6.7429	0.0843587	-6.42583	0.150598	-7.00896	0.329172	-4.14096	0.421239	-6.6448	0.326138	-6.44495	0.198777	-6.49277	0.229846	-6.44955	0.22326
Slc12a5	-0.468994	0.173239	-0.584457	0.23714	0.539962	0.303482	0.162858	0.13752	-3.58283	0.151075	0.422197	0.153774	-0.21734	0.112782	-0.770191	0.191071	0.108065	0.135305
Slc12a6	-3.48951	0.2159	-3.14245	0.146453	-3.29369	0.148671	-3.10892	0.128171	-3.27833	0.205341	-3.3441	0.108899	-3.31866	0.145381	-3.36797	0.0946617	-3.37283	0.154791
Slc12a7	-4.56768	0.1967	-3.88005	0.298223	-5.0311	0.381927	-3.70107	0.142368	-2.26926	0.197817	-5.05109	0.554201	-3.19094	0.107691	-3.21741	0.116297	-4.63368	0.429196
Calb1	-2.1562	0.213514	-1.57092	0.16835	-1.60874	0.117961	-2.22653	0.209105	-2.66714	0.237653	-1.36035	0.324394	-2.12521	0.175016	-1.83448	0.150009	-1.95356	0.198119
Camk2a	-2.28279	0.381458	-1.68473	0.279911	-1.87816	0.214497	-1.86854	0.109577	-2.09596	0.252252	-1.73212	0.384484	-1.3939	0.343685	-1.60679	0.298225	-2.35184	0.198363
Camk2b	-2.89889	0.236167	-2.63498	0.146476	-2.98711	0.24507	-3.17439	0.112741	-1.86334	0.190411	-2.51803	0.366186	-2.71521	0.27824	-2.58817	0.355818	-3.09695	0.252014
Brs3	-11.886	1.00475	-9.23818	0.699432	-8.1744	0.667602	-9.91994	0.687914	-2.89667	1.60163	-9.04022	0.2315	-9.86536	0.491624	-9.15998	0.692672	-8.79061	0.426673
Grpr	-3.7992	0.170126	-3.4843	0.231962	-7.24113	0.27445	-3.83927	0.210214	-3.79065	0.363925	-7.11492	0.334209	-3.81703	0.20777	-3.12376	0.401228	-6.7246	0.344772
Nmbr	-8.19422	0.355157	-6.90677	0.320064	-8.15888	0.584207	-7.30764	0.284694	-5.29704	0.510743	-7.77228	0.371309	-7.57897	0.353418	-6.5113	0.20417	-7.19095	0.302395
Vipr2	-3.18359	0.0974881	-3.03422	0.134703	-9.10174	0.668244	-2.19759	0.171522	-3.83027	0.222387	-9.34431	0.783067	-2.35521	0.145889	-2.15256	0.30973	-7.53343	0.274662
Avpr1a	-4.83804	0.0623132	-3.71017	0.268612	-7.53833	0.373758	-3.51466	0.136144	-3.50663	0.581379	-8.32331	0.777317	-4.23623	0.247236	-3.51324	0.365822	-6.63521	0.388732
Avpr2	-9.54381	0.557008	-9.10565	0.789704	-9.86955	0.385042	-9.01012	0.403296	-4.59537	0.454075	-10.3	0.163359	-9.99233	0.499116	-9.8975	0.54481	-9.65131	0.576636
Cul5	-3.28541	0.21296	-4.01092	0.233521	-3.92425	0.175848	-3.72498	0.214083	-5.36182	0.212298	-3.89337	0.304292	-3.90813	0.274982	-3.93296	0.252881	-4.51999	0.106017
