# Supplementary material for: Integrative Gene Regulatory Network Analysis Reveals Light-Induced Regional Gene Expression Phase Shift Programs in the Mouse Suprachiasmatic Nucleus
Source: PLoS One. 2012 May 25;7(5):e37833. doi: 10.1371/journal.pone.0037833 (PMC3360606; doi:10.1371/journal.pone.0037833)
Supplement: Table S8 — Location of the Promoter Sequences used for PAINT. Location of the promoters were defining using transcription start site of the RefSeq for each gene. The location information (listed in File S1) was then used to retrieve corresponding genomic sequences for PAINT analysis. (XLS) [file pone.0037833.s013.xls]

## Sheet: Promoter Sequences
gene name	entrez ID	chromosome	strand	promoter_start	promoter_end
avp	11998	2	-	130408177	130409277
grp	225642	18	+	66032148	66033248
vip	22353	10	-	4707223	4708323
bhlhe40	20893	6	+	108609623	108610723
bmal1 (arntl)	11865	7	+	120349979	120351079
clock	12753	5	-	76733473	76734573
cry1	12952	10	-	84647699	84648799
cry2	12953	2	-	92274126	92275226
csnk1d	104318	11	-	120852547	120853647
csnk1e	22373	15	-	79272387	79273487
gsk3b	56637	16	+	38088087	38089187
npas2	18143	1	+	39250117	39251217
nr1d1	217166	11	-	98636456	98637556
nr1d2	353187	14	-	19071520	19072620
per1	18626	11	+	68911458	68912558
per2	18627	1	-	93355805	93356905
per3	18628	4	-	150418631	150419731
rora	19883	9	+	68500609	68501709
rorb	225998	19	-	19185586	19186686
arih1	23806	9	-	59334081	59335181
btg2	12227	1	-	135975632	135976732
ccnl1	56706	3	-	65762047	65763147
cebpb	12608	2	+	167513415	167514515
csrnp1	215418	9	-	119893676	119894776
dusp1	19252	17	-	26645317	26646417
dusp4	319520	8	+	35869664	35870764
egr1	13653	18	+	35019861	35020961
egr2	13654	10	+	66999617	67000717
fos	14281	12	+	86813851	86814951
gadd45b	17873	10	+	80391836	80392936
jun	16476	4	-	94718813	94719913
junb	16477	8	-	87502547	87503647
kdm6b	216850	11	-	69227077	69228177
klf4	16600	4	-	55545247	55546347
nnat	18111	2	+	157384846	157385946
nr4a1	15370	15	+	101096277	101097377
nr4a2	18227	2	-	56976314	56977414
pim3	223775	15	+	88691624	88692724
plk2	20620	13	+	111184252	111185352
rrad	56437	8	-	107155121	107156221
slc39a6	106957	18	-	24762218	24763318
ssfa2	70599	2	+	79474582	79475682
stk40	74178	4	+	125780201	125781301
tiparp	99929	3	+	65331369	65332469
utrn	22288	10	-	12581433	12582533
avpr1a	54140	10	+	121884555	121885655
avpr2	12000	X	+	71136441	71137541
brs3	12209	X	+	54295251	54296351
cul5	75717	9	-	53475512	53476612
gabbr2	242425	4	-	47004486	47005586
gabra1	14394	11	-	41996332	41997432
gria1	14799	11	+	56824193	56825293
gria2	14800	3	-	80606613	80607713
gria4	14802	9	-	4796134	4797234
grin1	14810	2	-	25174583	25175683
grin2c	14813	11	-	115128457	115129557
grm1	14816	10	-	10802029	10803129
grm5	108071	7	+	94731678	94732778
grpr	14829	X	-	159987479	159988579
nmbr	18101	10	+	14479095	14480195
slc12a4	20498	8	-	108489839	108490939
slc12a5	57138	2	+	164792488	164793588
slc12a6	72425	2	+	112105471	112106571
slc12a7	20499	13	+	73900145	73901245
vipr2	22355	12	+	117315196	117316296
calb1	12307	4	+	15807411	15808511
camk2a	12322	18	+	61084286	61085386
camk2b	12323	11	-	5965651	5966751
creb1	12912	1	+	64578378	64579478
crebbp	12914	16	-	4213304	4214404
crem	12916	18	-	3337487	3338587
map2k1	26395	9	-	64101312	64102412
map3k1	26401	13	-	112599091	112600191
mapk1	26413	16	+	16982475	16983575
mapk3	26417	7	+	133902140	133903240
nras	18176	3	+	102861208	102862308
ppp1ca	19045	19	+	4191174	4192274
ppp2ca	19052	11	+	51911326	51912426
prkaca	18747	8	+	86495877	86496977
prkacb	18749	3	-	146475810	146476910
prkca	18750	11	-	108205102	108206202
prkcb	18751	7	+	129431639	129432739
prkcc	18752	7	+	3302658	3303758
prkg1	19091	19	-	31839423	31840523
prkg2	19092	5	-	99465998	99467098
rasa1	218397	13	-	85428991	85430091
rasa2	114713	9	-	96531822	96532922
rasa3	19414	8	-	13677487	13678587
rasd1	19416	11	-	59778344	59779444
